# 1 **Adaptive evolution in DNMT2 supports its role in the dipteran immune response**

2 Tamanash Bhattacharya<sup>1</sup>, Danny W. Rice<sup>1</sup>, Richard W. Hardy<sup>1\*</sup> and Irene L.G. Newton<sup>1\*</sup>

3

## 4 **Author affiliations:**

5 <sup>1</sup>Department of Biology, Indiana University Bloomington, USA

6 \*Corresponding Authors

7

## 8 **Abstract**

9 Eukaryotic nucleic acid methyltransferase (MTase) proteins are essential mediators of epigenetic and  
10 epitranscriptomic regulation. DNMT2 belongs to a large, conserved family of DNA MTases found in many  
11 organisms, including holometabolous insects like fruit flies and mosquitoes, where it is the lone MTase.  
12 Interestingly, despite its nomenclature, DNMT2 is not a DNA MTase, but instead targets and methylates  
13 RNA species. A growing body of literature suggest DNMT2 mediates the host immune response against a  
14 wide range of pathogens, including RNA viruses. Evidence of adaptive evolution, in the form of positive  
15 selection, can often be found in genes that are engaged in conflict with pathogens like viruses. Here we  
16 identify and describe evidence of positive selection that has occurred at different times over the course of  
17 DNMT2 evolution within dipteran insects. We identify specific codons within each ortholog that are under  
18 positive selection, and find they are restricted to four distinct domains of the protein and likely influence  
19 substrate binding, target recognition, and adaptation of unique intermolecular interactions. Additionally, we  
20 describe the role of the *Drosophila*-specific host protein IPOD, in regulating the expression and/or function  
21 of fruit fly DNMT2. Finally, heterologous expression of these orthologs suggest that DNMT2's role as an  
22 antiviral is host dependent, indicating a requirement for additional host-specific factors. Collectively, our  
23 findings highlight the adaptive evolution of DNMT2 in Dipteran insects, underscoring its role as an important,  
24 albeit non-canonical, regulator of host-pathogen interactions in mosquitoes and fruit flies.

25

## 26 **Keywords**

27 Methyltransferase, Adaptive Evolution, Diptera, Drosophilidae, Culicidae, Virus, Wolbachia

28

## 29 **Introduction**

30 Cellular DNA and RNA methyltransferases (MTases) are key mediators of epigenetic and epitranscriptomic  
31 regulation in eukaryotes. The former is carried out by a conserved family of DNA cytosine  
32 methyltransferases (DNMTs). The DNMT family includes true DNA MTases like DNMT1, DNMT3A,  
33 DNMT3B and DNMT3L (Goll and Bestor 2005; Denis, et al. 2011). The remaining member of the DNMT  
34 family is DNA MTase 2, or DNMT2, which, despite its name and sequence similarity to other DNMTs, has  
35 been demonstrated to have only residual DNA methylation activity *in vitro*. Instead, it has been shown that  
36 DNMT2 binds and methylates RNA substrates *in vivo* and *in vitro*, thus classifying it as a novel class of  
37 DNA-like RNA MTases (Jurkowski, et al. 2008; Denis, et al. 2011; Jeltsch, et al. 2017). Homologs of DNMT2

38 are present in the vast majority of animal, fungal and plant species. Notably, DNMT2 is the only known  
39 DNMT present in dipteran insects like *Drosophila melanogaster*, *Aedes aegypti*, *Aedes albopictus*, *Culex*  
40 *quinquefasciatus* and *Anopheles gambiae* (Lewis, et al. 2020). By extension, it is conceivable that all  
41 members of *Drosophila* and *Culicidae* families are DNMT2-only organisms.

42 Consistent with DNMT2's role as a bona fide RNA MTase, evidence of genome-wide CpG methylation is  
43 nearly absent in these insects, leaving the biological role of this MTase unclear (Takayama, et al. 2014;  
44 Lewis, et al. 2020). Past studies investigating the biological function of DNMT2 suggest that it functions as  
45 a predominantly cytoplasmic protein during cellular stress, which can lead to increased longevity and  
46 greater host survival under stress conditions (Lin, et al. 2005; Schaefer, et al. 2010). Under these conditions  
47 DNMT2 is responsible for methylating transfer RNAs (e.g. tRNA<sub>ASP</sub>, tRNA<sub>GLU</sub>), a modification that aids in  
48 protecting these RNA species from stress-induced degradation (Lin, et al. 2005; Schaefer, et al. 2010;  
49 Tuorto, et al. 2012). Aside from these known functions, the role of DNMT2 in the immune response is a  
50 fairly recent finding, following reports of its role in regulating the silencing of retrotransposons that otherwise  
51 contribute to cell stress (Phalke, et al. 2009; Schaefer and Lyko 2010; Durdevic, Hanna, et al. 2013;  
52 Durdevic and Schaefer 2013). Furthermore, proper functioning of DNMT2 in *Drosophila melanogaster* is  
53 required for efficient Dicer-2 activity and thus by extension, the RNA interference pathway (Durdevic, Mobin,  
54 et al. 2013). On its own, fruit fly DNMT2 inhibits several RNA viruses and protects the host against  
55 pathogenic bacteria (Durdevic, Hanna, et al. 2013; Bhattacharya, et al. 2017; Baradaran, et al. 2019).  
56 Furthermore, DNMT2 orthologs of several other arthropods have been shown to be involved in the  
57 colonization by pathogenic bacteria (*Helicoverpa armigera*), RNA viruses (*Aedes aegypti*, *Aedes*  
58 *albopictus*) and Plasmodium (*Anopheles albimanus*). Indeed, in previous studies we have demonstrated  
59 the roles of both *Drosophila melanogaster* and *Aedes* DNMT2 orthologs in regulating RNA virus infection.  
60 Notably, while DNMT2 in the fruit fly is responsible for limiting virus replication and production of infectious  
61 virus progeny, the *Aedes* orthologs seemingly play a proviral role in the mosquito host (Zhang, et al. 2013).  
62 Regardless, collectively these findings suggest that DNMT2 functions at the interface of host-pathogen  
63 interactions (Durdevic, Hanna, et al. 2013; Zhang, et al. 2013; Bhattacharya, et al. 2017; Baradaran, et al.  
64 2019; Claudio-Piedras, et al. 2019).

65 Host genes involved in host immunity face strong selective pressure which is reflected in positive selection  
66 signatures in the genome e.g. Relish (Imd pathway) and Ci (Hedgehog signaling pathway) etc. (Sawyer, et  
67 al. 2003). This contributes to the adaptive evolution of these genes and the encoded products, driven by  
68 intermolecular interactions between the protein and its target e.g. pathogen associated molecular patterns  
69 (PAMPs). Given its recently identified role in arthropod immunity, we hypothesized that recurrent host-  
70 pathogen conflicts have impacted the molecular evolution of DNMT2 in Dipteran insects. In light of their  
71 well-documented history of harboring pathogens such as RNA viruses, we focused our analyses on  
72 members of *Culicidae* and *Drosophila* (Durdevic, Hanna, et al. 2013; Zhang, et al. 2013; Bhattacharya, et  
73 al. 2017; Claudio-Piedras, et al. 2019). Consistent with our hypotheses, we found significant evidence of  
74 positive selection along the ancestral lineage to all Dipteran DNMT2s as well as among DNMT2 orthologs

75 of several members of the two aforementioned Dipteran families. Several amino acid positions in  
76 functionally important motifs of DNMT2 show evidence of positive selection. We found distinct differences  
77 in primary and tertiary protein structures between *Drosophila melanogaster* and *Aedes albopictus* DNMT2  
78 that extend to other members of their respective families. We present evidence that regulation of DNMT2  
79 is dramatically different in these two insects and that the antiviral function of DNMT2 is due to host cellular  
80 environment. Collectively, our results present evidence of adaptive evolution of DNMT2 in arthropods,  
81 underscoring its importance in host-pathogen interactions.

## 82 **Results**

### 83 **Evidence of adaptive evolution in DNMT2**

84 Prior studies have demonstrated that a high proportion of amino acid changes in *Drosophila* are driven by  
85 positive selection, and although statistical problems with models used to estimate positive selection may  
86 lead to “false positives” many studies, using different approaches, have detected a large proportion of  
87 positively selected sites in the *Drosophila* lineage, especially genes encoding for proteins that interact with  
88 pathogens (Sawyer, et al. 2003; Sella, et al. 2009; Jiang and Assis 2017; Kern and Hahn 2018). For  
89 example, Sawyer et.al found that a large majority (93%) of replacements present among 56 loci across  
90 *Drosophila melanogaster* and *Drosophila simulans* may be beneficial. As many dipterans are vectors for  
91 human pathogens, and infected by the endosymbiont *Wolbachia*, we hypothesized that DNMT2 in this  
92 group of insects may show evidence of positive selection. Indeed, evidence of positive selection in  
93 *Drosophila* DNMT2 has been reported earlier by Vieira et.al (Vieira, et al. 2018). However, that study was  
94 limited to identifying signatures of positive selection within *Drosophila* species. Here, our aim was to expand  
95 the scope of this previous analysis to additionally include DNMT2 orthologs from a total of 29 *Dipteran*  
96 insect species, which we evaluated for positive selection by maximum-likelihood analyses using CodeML  
97 (PAML package) (Yang 2007). Given the relevance of mosquitoes as disease vectors for viruses and other  
98 pathogens, our list included DNMT2 orthologs from a total of 20 species from the Culicidae family  
99 (Suborder: Nematocera), including 17 *Anopheles*, 2 *Aedes* and 1 *Culex* species (Figure 1A). Additionally,  
100 we included DNMT2 orthologs from 7 representative taxa spanning the Suborder Brachycera, including 5  
101 members of the *Glossina* genus and one each from the following five genera: *Stomoxys*, *Musca*, *Drosophila*  
102 and *Phlebotomus*. DNMT2 orthologs from 6 non-dipteran insects were included as outgroups (Figure 1A).  
103 Consistent with our hypothesis, significant signatures of positive selection (raw p-value < 0.05) were  
104 detected along the branch ancestral to all Dipteran insects and *Phlebotomus papatasi* (Branches 2, 3).  
105 Additionally, we found significant signatures of positive selection along the ancestral branch leading to the  
106 entire Culicidae (Branch 19), as well as along relatively recent branches within that family and deeper  
107 branches (#19, 20, and 25; Figure 1A, Table 1). Notably, several branches to important mosquito taxa  
108 exhibited signatures of positive selection, including the *Culex quinquefasciatus* lineage (p=8e-6, Branch 54)  
109 and several *Anopheles* species or recently diverged internal branches: *Anopheles dirus*, *Anopheles*  
110 *minimus*, and branches 21, 30, and 42 (Figure 1A). Outside of the Culicidae family, signatures of positive  
111 selection were detected along lineages within the Brachycera Suborder of Dipteran insects (Figure 1A,

112 Table 1). These included all ancestral lineages leading to genera within this Suborder, representing  
113 members of *Glossina* species, *Musca domestica*, *Stomoxys calcitrans*, *Phlebotomus*, and importantly,  
114 *Drosophila melanogaster* (Branches 2, 4, 5, 6, 7 and 10, Figure 1A). Additionally, in this analysis, the branch  
115 directly leading to *Drosophila melanogaster* was found to be under positive selection (Branch 5, Figure 1A).  
116 Taken together, these findings suggest an ongoing process of adaptive evolution in Dipteran DNMT2,  
117 suggesting potential roles of several, yet uncharacterized, DNMT2 orthologs in host-pathogen interactions.  
118 We have previously shown that *Drosophila* DNMT2 is antiviral and that *Wolbachia* infection modulates its  
119 expression (Bhattacharya et al., 2015). We therefore next aimed to perform more in-depth analyses of  
120 *Drosophila* DNMT2 orthologs to look for evidence of positive selection across 38 different *Drosophila*  
121 species encompassing the Sophophora (20 species) and *Drosophila* (18 species) sub-genera using  
122 CodeML (PAML package). DNMT2 sequence from *Scaptodrosophila lebanonensis* (*Scaptodrosophila*  
123 Genus) was used as an outgroup. The phylogenetic tree of *Drosophila* Dnmt2 orthologs inferred using  
124 Maximum-likelihood analyses was found to be largely congruent with previously reported phylogeny of  
125 *Drosophila* species, with distinct separation of DNMT2 orthologs into two known *Drosophila* subgroups  
126 (Figure 1B) (Russo, et al. 1995). Strong evidence of positive selection (raw p-value=0.002) was found in  
127 the lineage directly ancestral to all Sophophora (Branch 41) and weaker evidence (raw p-value=0.027) for  
128 the ancestral lineage to all *Drosophila* (Branch 2) and the lineages leading to *Drosophila grimshawi* (Branch  
129 23), *Drosophila bipectinata* (Branch 64), *Drosophila fusciphila* (Branch 66), and *Drosophila teissieri*  
130 (Branch 70). Notably, in this more focused analysis, positive selection was not found in *Drosophila*  
131 *melanogaster* (Branch 75), suggesting the absence of any recent adaptations since its divergence from  
132 other members of the Sophophora genus. Alternatively, we may lack statistical power to detect selection  
133 along these short branches. These findings suggest several instances of recent adaptive evolution within  
134 *Drosophila* DNMT2 since its divergence from Culicidae. Notably, these results are in line with the findings  
135 reported by Vieira et.al (Vieira, et al. 2018).

### 136 **Identification of codon sites under positive selection in DNMT2**

137 The results from our previous CodeML analyses suggested multiple instances of positive selection along  
138 Dipteran lineages. To identify specific residues likely having undergone adaptive evolution, we used the  
139 Bayes Empirical Bayes (BEB) posterior probabilities from CodeML to identify amino acid sites having  
140 experienced positive selection ( $dN/dS$  or  $\omega > 1$ ) within the protein-coding regions of DNMT2. Notably, we  
141 found several sites from the  $\omega > 1$  class with >95% probability across multiple Dipteran lineages (Table 1)  
142 and more specifically within the *Drosophila* genus (Table 2). Given their previous roles in host immunity,  
143 and the tractability of the model systems, we chose to focus our attention on codon sites present within  
144 lineages ancestral to or leading to *Aedes albopictus* DNMT2 (henceforth referred to as AaDNMT2) and  
145 *Drosophila melanogaster* DNMT2 (henceforth referred to as DmDNMT2).

146 It is possible for changes identified along internal branches to have changed again later in some lineages.  
147 We looked at sites identified on internal branches to see which extant taxa still have them by assessing the  
148 degree of conservation at these sites within Culicidae and Drosophilidae families (Supplementary Figure

149 1). Two sites (44G, 55G), identified as being under selection among all Dipteran DNMT2s (Branch 3, Table  
150 1) were found to be conserved in >80% of Culicidae and Drosophilidae species. Of the two sites, the  
151 ancestral variant 44G was conserved in the majority of the taxa (>83%, 24/30). In contrast, a conserved  
152 replacement site (55S) was found in the vast majority of species (>97%, 29/30), with only one *Anopheles*  
153 species harboring the ancestral 55G site. Aside from a few exceptions, conservation of the codon sites  
154 identified within Culicidae and Drosophilidae were limited to taxa within these respective families. Within  
155 Culicidae, our BEB analyses identified 19 amino acid positions under selection (Branches 54,19-21,28,30,  
156 Table 1). Mapping of these sites on a multiple sequence alignment of Culicidae species identified 4 amino  
157 acid sites unique to a single species, while the rest of the amino acid residues under selection were found  
158 to be present among multiple Culicidae taxa (Supplementary Figure 1A). Notably, despite the absence of  
159 selection detected along the *Aedes* lineage, 9 sites (Branch 19, Table 1) were found to occur within *Aedes*  
160 DNMT2 sequences, suggesting that these changes occurred prior to the divergence of this genus.

161 We next performed BEB analysis to identify codon sites under selection within *Drosophila* DNMT2. In order  
162 to represent all adaptive amino acid changes that have occurred in this taxa over its entire evolutionary  
163 period, 4 sites identified specifically in *Drosophila melanogaster* (Figure 1A, Branch 5, Table 1) were  
164 grouped alongside those identified in the most ancestral (2 sites) and most recent (2 sites) Dipteran  
165 lineages (Figure 1A Branches 3 and 4, Table 1), as well as sites identified in our *Drosophila* specific  
166 analyses (3 sites) appearing on the ancestral lineage to the Sophophora subgenus (Figure 1B, Table 2).  
167 Mapping of these 11 sites identified along lineages ancestral to *Drosophila melanogaster* revealed near-  
168 perfect conservation within *Drosophila* species from both Sophophora and *Drosophila*, suggesting that  
169 these changes occurred prior to the divergence of these subgroups. In contrast, sites identified along the  
170 branch ancestral to Sophophora were restricted to members of this subgroup (Supplementary Figure 1B).  
171 It should be noted that these 3 codon sites were identified previously by Vieira et.al, which adds support to  
172 our analyses (Table 2) (Vieira, et al. 2018). None of the 9 replacement amino acids unique to *Drosophila*  
173 were identified at the corresponding sites within members of the Culicidae, with one exception  
174 (Supplementary Figure 1B, Table 1-2).

175 We are ultimately interested in how these hypothesized adaptive changes in DNMT2 alter the function of  
176 the protein. Towards that end, we mapped these identified sites on the primary amino acid sequence of  
177 DNMT2 to determine their locations relative to previously identified functionally important regions  
178 (Falckenhayn, et al. 2016). Eukaryotic DNMT2 is broadly divided into two domains, the catalytic domain  
179 and the target recognition domain (TRD). The former can be further divided into ten functional motif regions  
180 (I – X) (Figure 2). Analyses of amino acid conservation across all sites between DNMT2 orthologs from  
181 *Drosophila* and Culicidae families suggest an overall 64% conservation in the primary amino acid sequence,  
182 with a higher degree of conservation, 77% within the catalytic region and 56% for the rest (Supplementary  
183 Figure 1). Of the 9 *Aedes* sites identified from the BEB analyses (Figure 1, branches 3 and 19), 5 were  
184 present within the catalytic domain (Supplementary Figure 1). These include one (55S) in the Motif II region,  
185 one (84F) in the active site loop adjacent to the catalytic PPCQ Motif IV region and two (323 S, 328 E)



186 within the final Motif X region. One additional site (105I) was present within the catalytic domain albeit in a  
187 non-motif region. The rest of the 4 identified sites mapped to the TRD (Supplementary Figure 1A),  
188 suggesting that perhaps the *Aedes* DNMT2 has diverged in its target recognition. We next plotted the 11  
189 sites from branches leading to *D. melanogaster* identified from our BEB analyses along the primary  
190 *DmDNMT2* amino acid sequence (Supplementary Figure 1B).

191 While mapping the locations on the primary sequence allowed us to gauge the general location and  
192 conservation of these sites on the DNMT2 proteins of Culicidae and Drosophilidae, to assess the spatial  
193 importance of the amino acid sites identified in our BEB analyses with respect to MTase function, we next  
194 mapped a subset of the sites that were found within *Aedes albopictus* and *Drosophila melanogaster* on the  
195 3D structures of *AaDNMT2* and *DmDNMT2*, respectively (Figure 2). These orthologs were chosen as  
196 representative members of the Culicidae and Drosophilidae families, given their previously described roles  
197 in virus regulation and host immunity (Durdevic, Hanna, et al. 2013; Zhang, et al. 2013; Bhattacharya, et  
198 al. 2017; Claudio-Piedras, et al. 2019). Due to the absence of empirical structural information regarding  
199 *AaDNMT2* and *DmDNMT2*, an intensive structural modeling approach using existing, experimentally solved  
200 crystal structures gathered from the Protein Data Bank (PDB) was used to generate predicted structures of  
201 these two DNMT2 orthologs (Figure 2). Furthermore, in order to gather a better understanding of the spatial  
202 distribution of the sites relative to the canonical MTase catalytic binding pocket, we used molecular docking  
203 to introduce the methylation substrate *S*-adenosyl-*L*-homocysteine (SAH) to identify the co-factor binding  
204 pocket (Grosdidier, et al. 2011).

205 Mapping of the aforementioned positively selected sites on *AaDNMT2* and *DmDNMT2* tertiary structures  
206 revealed the occurrence of positive selection at four major regions that were consistent between these two  
207 DNMT2 orthologs (Figure 2A). These include the four different regions: (1) region spanning Catalytic Motifs  
208 I and II (*AaDNMT2*: 2 sites, 44G, 55S, *DmDNMT2*: 3 sites, 23G, 44G, 55S), (2) Catalytic Motif IV Region  
209 and adjacent “active site loop” (*AaDNMT2*: 1 site, 84F, *DmDNMT2*: 2 sites, 78H, 87T), (3) Catalytic Motif X  
210 Region adjacent to the binding pocket for the canonical MTase co-factor *S*-adenosyl-methionine SAM and  
211 its resulting product *S*-adenosyl-homocysteine SAH (*AaDNMT2*: 2 sites, 323S, 328E, *DmDNMT2*: 1 site,  
212 320K), (4) Target Recognition Domain involved in interactions with the nucleic acid target, facing away from  
213 the binding pocket, flanking the conserved CFT motif (*AaDNMT2*: 2 sites, 208K, 222C, *DmDNMT2*: 5 sites,  
214 220H, 223Q, 245T, 252S, 261L) (Figure 2A). Incidentally, past studies indicate these four regions contribute  
215 significantly towards DNMT2’s MTase activity with regards to substrate binding and catalytic activity (Goll,  
216 et al. 2006). Furthermore, high clustering of sites in the TRD region is significant, given that they (*AaDNMT2*:  
217 208, *DmDNMT2*: 261L) are located in a catalytically critical region that is known to penetrate the major  
218 groove of the nucleic acid substrate (Ye, et al. 2018). Finally, for both orthologs, a large proportion of sites  
219 present at the N-terminus (*AaDNMT2*: 44G,55S,105I, *DmDNMT2*: 23G,44G,55S,66A) and the TRD  
220 (*AaDNMT2*: 147H, 222C, *DmDNMT2*: 220H, 223Q, 245T, 252S) were found to be present on the solvent  
221 accessible surface (Figure 2B,C). These observations are in line with prior evidence that suggest that  
222 solvent exposure of protein surfaces have the strongest impact on adaptive mutations, likely driven by

223 unique intermolecular interactions (Moutinho, et al. 2019). Indeed, we found this feature to not be limited  
224 just to *AaDNMT2* and *DmDNMT2*, as mapping the positively selected sites on the tertiary structure of  
225 *Anopheles darlingi* DNMT2 revealed a vast majority of sites to occur on the solvent accessible protein  
226 surface (Figure 2B,C). Taken together, these observations suggest potential functional consequences of  
227 these amino acid substitutions on *Aedes albopictus* and *Drosophila melanogaster* DNMT2 with regards to  
228 catalytic activity and/or protein-protein interactions.

### 229 ***AaDNMT2* and *DmDNMT2* differ in structure**

230 We and others have previously demonstrated regulation of RNA virus replication by *Aedes* DNMT2  
231 orthologs in their respective host backgrounds, suggesting their involvement in host-pathogen interactions  
232 (Durdevic, Hanna, et al. 2013; Bhattacharya, et al. 2017). However, in contrast to the antiviral nature of  
233 *DmDNMT2*, effects of *Aedes aegypti* (henceforth referred to as *AeDNMT2*) and *Aedes albopictus*  
234 (*AaDNMT2*) are distinctly proviral (Zhang, et al. 2013). Distinct molecular evolution between *Aedes* and  
235 *DmDNMT2* orthologs led us to next investigate whether potential differences in structure and/or regulation  
236 might contribute to the functional differences of these DNMT2 orthologs, using *AaDNMT2* and *DmDNMT2*  
237 as representative MTase orthologs from Culicidae and Drosophilidae families.

238 First, we assessed the broader differences in protein sequence across members of Culicidae and  
239 Drosophilidae. Multiple sequence alignment of DNMT2 primary amino acid sequences indicate that  
240 differences between overall fly and mosquito DNMT2 orthologs are most notable in the N-terminal end and  
241 the C-terminal (residues 282-292) target recognition domains. This is evidenced by the low ( $\leq 20\%$ )  
242 conservation scores in these two regions (Figure 2A). The N-terminal end of mosquito DNMT2 is variable  
243 in length across different taxa in the Culicidae family and are, on average, 7-12 aa longer than the  
244 Drosophilidae counterparts, with the *Anopheles darlingi* DNMT2 ortholog being 47 aa longer in length  
245 (Supplementary Figure 3). In contrast to mosquito DNMT2, we found two instances of extended N-termini  
246 within Drosophilidae DNMT2; *Drosophila busckii* (17 aa) and *Drosophila serrata* (4 aa). We found an overall  
247 lack of sequence conservation among the different Culicidae orthologs, aside from a few residues that are  
248 conserved within members of the *Aedes* and *Anopheles* genus. *In silico* prediction analyses also showed  
249 this region to be devoid of any ordered secondary structure, suggesting conformational flexibility and  
250 potential to participate in protein-protein interactions. The other prominent difference in primary sequence  
251 between DNMT2 orthologs from these two Dipteran families occur within the target recognition domain  
252 (TRD), which is extended (10-12 aa) in the vast majority of Drosophilidae DNMT2 orthologs, with the  
253 exception of *Drosophila ananassae* and *Drosophila bipectinata* (Supplementary Figure 3). However, unlike  
254 the N-terminal extension within Culicidae, the extended TRD of Drosophilidae DNMT2 contains a conserved  
255 stretch of three residues (KSE) that constitute the start of a predicted  $\alpha$ -helix (Figure 3, Supplementary  
256 Figure 3). Taken together, it is conceivable that such differences in the TRD contribute to differential  
257 substrate-MTase interactions between Culicidae and Drosophilidae DNMT2 orthologs.

258 *AaDNMT2* (344 aa) and *DmDNMT2* (345 aa) are comparable in size, sharing 46% amino acid sequence  
259 identity. However, while this does not necessarily imply that these DNMT2 orthologs differ to the same

260 extent when it comes to their overall structure, in line with other Culicidae and Drosophilidae species, these  
261 orthologs exhibit major differences in two regions; the N-terminus and the Target Recognition Domain  
262 (Figure 2A). We therefore compared tertiary structures of these orthologs to identify how these differences  
263 affect their respective structures. The extended N-terminal end of AaDNMT2 remained surface exposed in  
264 an unstructured, flexible conformation, indicating the ability to interact with potential interaction partners  
265 (Figure 3A). The extended TRD region within *DmDNMT2* was also found to be mostly surface exposed,  
266 adopting a short  $\alpha$ -helical conformation at the C-terminal end. Comparison to crystal structures of DNMT2  
267 from army worm (*Spodoptera frugiperda*, PDB ID: 4HON) and fission yeast (*Schizosaccharomyces pombe*,  
268 PDB ID: 6FDF) indicate that the rest of the TRD is unstructured and conformationally flexible. Given the  
269 importance of the conformation state of this TRD region for interactions with the nucleic acid substrate, the  
270 extended region within *DmDNMT2* carries the potential to alter MTase-substrate interactions (Goll, et al.  
271 2006).

272 Outside of the two aforementioned regions, other notable structural differences are in the 20aa long active  
273 site loop region adjacent to the catalytic PPCQ motif. This region appears to be more structured in  
274 AaDNMT2 relative to *DmDNMT2*, consisting of a short stretch of residues forming an  $\alpha$ -helix (Figure 3A).  
275 We found this feature to be consistent with the *in silico* secondary structure prediction for this AaDNMT2  
276 region. However, in contrast to the estimated 3D structure, this  $\alpha$ -helical stretch was predicted to be  
277 extended for *DmDNMT2*, spanning the entirety of the active site loop. This is likely a result of differences  
278 in the amino acid composition within this region between the two orthologs, where residues present within  
279 AaDNMT2, e.g. Proline (P), Valine (V), Phenylalanine (F), are more likely to disrupt formation of  $\alpha$ -helices.  
280 It should be noted, however, that this region has been suggested to adopt different structural conformations,  
281 switching between structured and unstructured  $\alpha$ -helices, upon nucleic acid binding [34]. Multiple sequence  
282 alignment and structural modelling of Culicidae and Drosophilidae DNMT2 orthologs suggests that this  
283 feature is consistent within members of the respective families. At the same time, it should be noted that  
284 that these modelled structures are built on snapshots of otherwise dynamic crystal structures, and therefore  
285 limit our interpretation given that each structure is restrained to a singular, static conformation.

286 Aside from differences in secondary and tertiary structure, physiochemical properties of amino acids  
287 contribute to their spatial distribution and the propensity to remain either buried or exposed in a solvent  
288 accessible conformation. This attribute of proteins can also influence interactions with other biomolecules,  
289 which for enzymes like MTases include cognate interaction partners such as regulators and/or nucleic acid  
290 substrates. We therefore asked whether AaDNMT2 and *DmDNMT2* differ significantly in terms of their  
291 surface charge distribution profiles. Mapping of electrostatic charge densities on solvent accessible 3D  
292 surfaces revealed an overall greater distribution of charged residues on the surface of AaDNMT2. This  
293 included a distinctly larger patch of negatively charged residues in the TRD (Figure 3B). As expected, both  
294 DNMT2 orthologs contained a high density of positive charge in and around the catalytic region known to  
295 bind the negatively charged nucleic acid substrate. Additionally, in line with its role in substrate binding, the  
296 catalytic helix adjacent region of AaDNMT2 was determined to be largely positively charged. This attribute



297 however was noticeably absent from *DmDNMT2*, whose extended catalytic helix adjacent region was found  
298 to be moderately negatively charged (Figure 3B).

299 Taken together, structural superposition of *AaDNMT2* and *DmDNMT2* demonstrates overall structural  
300 congruency between the two orthologs, but also shows significant differences which potentially indicate  
301 unique protein-protein and/or protein-substrate interactions for each ortholog.

### 302 ***Drosophila* IPOD regulates DNMT2 expression**

303 Pathways and host factors involved in regulating DNMT2 expression in dipteran insects are poorly  
304 understood. In a past study, Kunert et.al. identified a potential host factor in *Drosophila melanogaster*, the  
305 aptly named Interaction Partner of DNMT2 or IPOD, in regulating *DmDNMT2* expression and function  
306 (Kunert 2005). However, it is unclear whether IPOD is involved in DNMT2 regulation within all Dipteran  
307 insects or whether distinct modes of DNMT2 regulation have evolved across different Dipteran families. In  
308 light of our previous results highlighting differences between Drosophilidae and Culicidae DNMT2, we next  
309 investigated the presence and conservation of IPOD orthologs among the species included in this study.  
310 Additionally, we examined the role of this protein in DNMT2 regulation within *Drosophila melanogaster*.

311 The protein IPOD is predominantly restricted to *Drosophila* species, based on BLAST searches of Dipteran  
312 insect genomes found to encode DNMT2 orthologs (Figure 4A, Supplementary Figure 4). Importantly, this  
313 was not due to the absence of available sequence information, as nearly complete genome assemblies are  
314 present for all taxa except for *Polypedilum vanderplanki*. Phylogenetic analyses of these *Drosophila* IPOD  
315 sequences illustrates its conservation within both *Drosophila* and *Sophophora* sub-groups of the *Drosophila*  
316 genus, with an average 46% amino acid sequence identity across all positions (Figure 4A,B). Furthermore,  
317 MirrorTree analyses of *Drosophila* DNMT2 and IPOD ortholog phylogenies revealed significant mirroring of  
318 the two trees, indicating a strong inter-protein co-evolutionary relationship between the two; Correlation:  
319 0.787, P Value  $\leq 0.000001$  (Figure 4). This was further validated by the results from TreeCmp analyses  
320 assessing the Robinson Foulds (RF) and Matching Split (Williams, et al.) distances between *Drosophila*  
321 IPOD and DNMT2 trees, which showed a similar high congruence between the two tree topologies; RF  
322 (0.5) = 8, MS = 27.0. In contrast, very low congruence, with normalized distances  $\leq 0.4$  was found when  
323 the trees were compared to random trees generated according to Yule (RF/MS to YuleAvg) and uniform  
324 (RF/MS to UnifAvg) models; RF (0.5)\_to UnifAvg = 0.3841, RF (0.5) to YuleAvg = 0.3852, MS\_to UnifAvg  
325 = 0.2426, MS to YuleAvg = 0.2880.

326 In order to better understand IPOD's cellular function, we performed a domain analyses using Pfam and  
327 InterPro. We identified a DUF4766 (PF15973) domain (Residues: 82 – 232) present in all orthologs, and  
328 InterPro suggested nearly 90% of the protein (Residues: 33 – 349) contains a non-cytoplasmic domain,  
329 with a smaller signal peptide domain (Residues: 1 – 32) present at the N-terminal end (Posterior Probability  
330 Score > 0.99) (Goll, et al. 2006; Ye, et al. 2018). Notably, we found nearly 28% (97/397) of the total protein  
331 length to be made of glycine residues, which are associated with a high degree of disordered structure.  
332 Indeed, an IUPred search predicted large stretches of intrinsically disordered regions along the entire length  
333 of the protein (Disorder Tendency Score > 0.5) indicating a potential role of IPOD in mediating complex

334 protein-protein interactions (Dosztányi, et al. 2005; Dosztányi 2018). Taken together, these features are  
335 consistent with IPOD's role as a nuclear protein with a potential role in transcriptional regulation.  
336 Interestingly, the distinct lack of a canonical DNA-binding domain within IPOD suggests that its ability to  
337 interact with other DNA-binding proteins is critical for its role in transcriptional regulation of *DmDNMT2*.  
338 Given the absence of IPOD orthologs in the members of the Culicidae family e.g. *Aedes* mosquitoes, we  
339 hypothesized that IPOD regulates *DmDNMT2* (*Mt2*) expression, potentially replacing the role of miRNAs in  
340 the mosquito system. To validate IPOD's role in *DmDNMT2* regulation, we used RNAi to knockdown IPOD  
341 (*IPOD*) expression *in vivo* in a transgenic fruit fly model by driving the expression of IPOD targeting short-  
342 hairpin RNA (shRNA) and measured relative mRNA levels of both *IPOD* and *Mt2* genes. We also measured  
343 these levels within the context of transgenic RNAi flies expressing shRNA against *DmDNMT2* to determine  
344 whether it affected levels of *IPOD* transcripts. Indeed, knocking down *IPOD* expression led to significantly  
345 reduced *Mt2* mRNA levels in flies expressing *IPOD*-targeting shRNA; Two-tailed t-tests on log-transformed  
346 values; *IPOD*:  $p < 0.05$ ,  $t = 3.678$ ,  $df = 8.00$ , *Mt2*:  $p < 0.05$ ,  $t = 2.454$ ,  $df = 8.00$  (Figure 4D). Conversely,  
347 depleting *DmDNMT2* did not cause any significant change in *IPOD* mRNA levels, suggesting that *IPOD*  
348 likely functions upstream in the regulatory pathway; t-tests on log-transformed values, *IPOD*, *Mt2*:  $p < 0.01$ ,  
349  $t = 2.576$ ,  $df = 12.00$ , *IPOD*:  $p = 0.717969$ ,  $t = 0.3686$ ,  $df = 14.00$  (Figure 4E). Additionally, we wondered  
350 whether knockdown of IPOD affects virus inhibition within the context of a *Wolbachia*-colonized fly host.  
351 We reasoned that if IPOD is a positive regulator of *DmDNMT2* expression, its loss would lead to a  
352 subsequent reduction in *DmDNMT2* levels, thereby rescuing virus from *Wolbachia*-mediated inhibition,  
353 phenocopying our previous results (Bhattacharya, et al. 2017). Flies expressing *IPOD*-targeting shRNA  
354 were challenged with a SINV expressing a translationally fused luciferase reporter (SINV-nLuc) and virus  
355 replication at 12-, 24- and 48-hours post infection was measured by quantifying luciferase activity as a proxy  
356 for viral gene expression. Consistent with results obtained in our previous study, knockdown of *IPOD* in  
357 *Wolbachia*-colonized flies led to a significant increase in viral RNA, likely as a consequence of reduced  
358 *DmDNMT2* levels; Two-way ANOVA with Sidak's post-hoc multiple comparisons test; *IPOD* knockdown:  $p$   
359  $< 0.01$ , Time:  $p < 0.01$  (Figure 4F). This effect was independent of any change in endosymbiont titer  
360 (Unpaired Welch's t-test:  $p = 0.4788$ ,  $t = 0.7695$ ,  $df = 4$  (Supplementary Figure 5)). It should be noted that  
361 we have previously demonstrated *Wolbachia* titer does not change as a result of *DmDNMT2* (*Mt2*)  
362 knockdown in flies using the same experimental setup (Bhattacharya, et al. 2017). Taken together, these  
363 results support IPOD's role in regulating *DmDNMT2* expression in the fruit fly. Furthermore, it notably  
364 demonstrates its importance in *Wolbachia*-mediated virus inhibition in terms of regulating *DmDNMT2*  
365 expression.

#### 366 **Antiviral role of DNMT2 is host-dependent**

367 Finally, we asked whether the antiviral role of *DmDNMT2* is a consequence of intrinsic features unique to  
368 this ortholog, or if this antiviral activity relies on specific interactions unique to its native host cell  
369 environment. To this end, we carried out heterologous expressions of *DmDNMT2* and *AaDNMT2* in their  
370 non-native *Aedes albopictus* and *Drosophila melanogaster* cells alongside their native counterparts and

371 assessed their effect on virus. It should be noted, that ectopic expression of the non-native orthologs was  
372 carried out in the presence of the respective endogenous MTases. However, given the low levels of native  
373 DNMT2 expression in the cell, we reasoned that ectopic expression of the non-native ortholog should allow  
374 it to function as the dominant MTase variant.

375 Previous work has demonstrated that ectopic expression of *DmDNMT2* in *Drosophila melanogaster* derived  
376 JW18 cells causes reduction in infectious virus production, mirroring its antiviral role *in vivo* (Durdevic,  
377 Hanna, et al. 2013; Bhattacharya, et al. 2017). Altogether, *DmDNMT2* is able to restrict multiple viruses  
378 from at least four distinct RNA virus families highlighting a broad spectrum of antiviral activity. To determine  
379 whether this property is unique to *DmDNMT2* in the *Drosophila melanogaster* host, we expressed  
380 *AaDNMT2* in this host background and tested its effect on infectious virus production following challenge  
381 with the prototype alphavirus, SINV. *Drosophila melanogaster* derived JW18 cells (cleared of *Wolbachia*  
382 infection) were transfected with FLAG-tagged versions of *DmDNMT2* or *AaDNMT2* and were challenged  
383 with SINV at an MOI of 10 particles/cell approximately 72 hours post transfection. Cell supernatants were  
384 collected after 48 hours post infection and viral titers assayed on vertebrate baby hamster kidney fibroblast  
385 (BHK-21) cells using standard plaque assays. Consistent with our previous report, we saw a significant  
386 reduction in viral titer in cells expressing *DmDNMT2*, compared to cells expressing the empty vector control.  
387 Notably, this result was phenocopied in cells expressing the non-native *AaDNMT2* ortholog; One-way  
388 ANOVA with Tukey's post hoc test for multiple comparisons: Empty Vector vs *DmDNMT2*:  $p = 0.0016$ ,  
389 Empty Vector vs *AaDNMT2*:  $p = 0.0017$ , *DmDNMT2* vs *AaDNMT2*:  $p = 0.9971$  (Figure 5B). We also  
390 assessed the effect of *DmDNMT2* and *AaDNMT2* expression on the per-particle infectivity of these progeny  
391 viruses, which is presented as the specific infectivity ratio of total infectious virus titer and total viral genome  
392 copies present in the cell supernatant (Bhattacharya, et al. 2020). In this case, expression of both DNMT2  
393 orthologs were found to significantly reduce virion infectivity in cells compared to those expressing the  
394 empty vector; One-way ANOVA with Tukey's post hoc test for multiple comparisons: Empty Vector vs  
395 *DmDNMT2*:  $p = 0.0030$ , Empty Vector vs *AaDNMT2*:  $p = 0.0066$ , *DmDNMT2* vs *AaDNMT2*:  $p = 0.6951$   
396 (Figure 5C). These results indicate that like *DmDNMT2*, *AaDNMT2*'s MTase activity is antiviral within the  
397 context of the fruit fly, presumably through hypermethylation of the target viral and/or host RNAs (Figure 6).

398  
399 At this point we should emphasize that *AaDNMT2* has been shown to be proviral in the *Aedes* context.  
400 While *Wolbachia* upregulates *DmDNMT2*, leading to virus inhibition, colonization by *Wolbachia* in *Aedes*  
401 backgrounds reduces *AaDNMT2* expression, leading to RNA virus restriction (Zhang *et al.*, 2013). At the  
402 same time, *AaDNMT2* expression is induced in the presence of virus alone, implying a proviral role that is  
403 lost in the presence of *Wolbachia*. We therefore reasoned that ectopic expression of *AaDNMT2* should  
404 rescue virus from *Wolbachia*-mediated inhibition in *Aedes* mosquito cells. We wondered, therefore, if  
405 heterologous expression of *DmDNMT2* in the *Aedes* cellular context would result in a proviral phenotype.  
406 *Aedes albopictus* (C710) derived cells (colonized with the *w*Stri *Wolbachia* strain) were transfected with  
407 FLAG-tagged versions of *DmDNMT2* or *AaDNMT2* and were challenged with SINV at an MOI of 10

408 particles/cell approximately 72 hours post transfection. As before, cell supernatants were collected after 48  
409 hours post infection and viral titers assayed on vertebrate baby hamster kidney fibroblast (BHK-21) cells  
410 using standard plaque assays. In line with our hypotheses, expression of AaDNMT2 in these cells was  
411 associated with a significant increase in SINV titer. However, we did not find any significant changes in  
412 virus titer from cells expressing the non-native *DmDNMT2* ortholog; One-way ANOVA with Tukey's post  
413 hoc test for multiple comparisons: Empty Vector vs *DmDNMT2*:  $p = 0.0937$ , Empty Vector vs AaDNMT2:  $p$   
414  $< 0.0001$ , *DmDNMT2* vs AaDNMT2:  $p = 0.0001$  (Figure 5E). We also observed a similar trend after  
415 measuring the per-particle infectivity of these progeny viruses, with an increase in virion infectivity upon  
416 expression of AaDNMT2 but not *DmDNMT2*; One-way ANOVA with Tukey's post hoc test for multiple  
417 comparisons: Empty Vector vs *DmDNMT2*:  $p = 0.8969$ , Empty Vector vs AaDNMT2:  $p = 0.0060$ , *DmDNMT2*  
418 vs AaDNMT2:  $p = 0.0095$  (Figure 5F). Additionally, we assessed the effect of heterologous *DmDNMT2* on  
419 viral RNA levels in the cell based on previous reports that demonstrated the ability of AaDNMT2 to rescue  
420 virus replication in the presence of *Wolbachia* (Zhang, et al. 2013). Consistent with previous findings,  
421 expression of AaDNMT2 significantly improved SINV RNA levels in cells. However, heterologous  
422 expression of *DmDNMT2* did not have any effect on SINV RNA levels; One-way ANOVA with Tukey's post  
423 hoc test for multiple comparisons: SINV RNA, Empty Vector vs *DmDNMT2*:  $p = 0.7875$ , Empty Vector vs  
424 AaDNMT2:  $p < 0.05$ , *DmDNMT2* vs AaDNMT2:  $p < 0.05$  (Supplementary Figure 5A). Finally, we quantified  
425 *Wolbachia* gene expression across these conditions to ensure that any changes in virus fitness was not  
426 caused due to changes in endosymbiont titer. We did not find any evidence of either AaDNMT2 or  
427 *DmDNMT2* expression to have any effect on *Wolbachia wsp* gene expression; Empty Vector vs *DmDNMT2*:  
428  $p = 0.4121$ , Empty Vector vs AaDNMT2:  $p = 0.5639$ , *DmDNMT2* vs AaDNMT2:  $p = 0.9523$  (Supplementary  
429 Figure 5B).

430 Altogether these results suggest that heterologous expression of *DmDNMT2* in mosquito cells has no effect  
431 on virus fitness. We hypothesize that the cellular context of expression determines the interaction between  
432 host, DNMT2 ortholog, and virus. Given the role of Drosophila-specific host factor IPOD in regulating  
433 *DmDNMT2* antiviral function (Figure 4), and the detected adaptive changes on DNMT2's surface, we  
434 speculate that this lack of *DmDNMT2* activity in mosquito cells (Figure 5E,F) might occur due to the lack of  
435 one or more interaction partners or co-factors.

436

## 437 Discussion

438 Here we present a functional analysis of adaptive evolution of DNMT2 in Dipteran insects that adds support  
439 to recent reports describing its role in host innate immunity (Durdevic, Hanna, et al. 2013; Durdevic and  
440 Schaefer 2013; Zhang, et al. 2013; Bhattacharya, et al. 2017; Baradaran, et al. 2019; Claudio-Piedras, et  
441 al. 2019). The biological function of DNMT2 remains unexplored in a vast majority of arthropods. Where it  
442 has been studied, for example in *Drosophila melanogaster*, loss of function of DNMT2 is not associated  
443 with any severe developmental issues or lethality (Goll, et al. 2006). Additionally, DNMT2-only insects like  
444 fruit flies and other holometabolous insects exhibit very low to no CpG methylation across their genome, in

445 line with DNMT2's lack of DNA MTase activity (Lewis, et al. 2020). Recent studies suggest that DNMT2 is  
446 a part of the cellular stress response that also acts against external stressors like pathogen challenges.  
447 Indeed, *DmDNMT2* confers protection against a wide range of RNA viruses and bacteria like *Acetobacter*  
448 *tropicalis*, *Lactobacillus fructivorans* and *Acetobacter pomorum* (Durdevic, Hanna, et al. 2013;  
449 Bhattacharya, et al. 2017). Similarly, the DNMT2 ortholog in *Helicoverpa armigera* (Order: Lepidoptera) has  
450 been shown to confer protection against systemic infections by *Bacillus thuringiensis* and *Serratia*  
451 *marcescens* (Baradaran, et al. 2019). However, there are instances where DNMT2 regulates how well  
452 certain pathogens colonize the host in a manner that is seemingly beneficial to the former. Examples of this  
453 can be found among members of the Culicidae family (Zhang, et al. 2013; Claudio-Piedras, et al. 2019) .  
454 In each of these cases, expression of DNMT2 is elevated following an infectious bloodmeal containing  
455 either the parasite *Plasmodium berghei* (*Anopheles albimanus*) or DENV (*Aedes aegypti*) (Zhang, et al.  
456 2013; Claudio-Piedras, et al. 2019). Notably, pharmacological inhibition or miRNA-mediated knockdown of  
457 DNMT2 in these species correlates with reduced host susceptibility to infection. However, it is clear from  
458 these examples that Drosophilidae and Culicidae DNMT2 plays an important role in shaping the host  
459 immune response to a wide range of pathogens, notably RNA viruses (Durdevic, Hanna, et al. 2013;  
460 Durdevic and Schaefer 2013; Zhang, et al. 2013; Bhattacharya, et al. 2017; Baradaran, et al. 2019; Claudio-  
461 Piedras, et al. 2019).

#### 462 **Elucidating the molecular evolution of DNMT2**

463 Signatures of positive selection are often a hallmark of genes involved in host immunity (Moutinho, et al.  
464 2019). To determine whether DNMT2 itself has been subjected to such selection, we carried out CodeML  
465 analyses of DNMT2 orthologs from Dipteran insects, with an increased focus on members of the Culicidae  
466 and Drosophilidae families based on their roles in host immunity (Yang 2007). In previous studies, we and  
467 others have described the role of *DmDNMT2* and *Aedes* DNMT2 orthologs in *Wolbachia*-mediated inhibition  
468 of RNA viruses (Zhang, et al. 2013; Bhattacharya, et al. 2017). DNMT2 is thought to interact with the viral  
469 RNA in the cytoplasm and influence virus replication in a manner that is dependent on their catalytic activity  
470 (Durdevic et al., 2013). Furthermore, overexpression or loss-of-function of *DmDNMT2* caused a  
471 corresponding increase and reduction in virus restriction, while the reverse phenotype is observed for  
472 *AaDNMT2* (Bhattacharya et al., 2017; Zhang et al., 2013). Indeed, overexpression of *AaDNMT2* caused a  
473 corresponding increase in virus replication, respectively, indicating a pro-viral role for this ortholog (Zhang  
474 et al., 2013). Consistent with known roles of *DmDNMT2* and *AaDNMT2* in virus regulation, in this study we  
475 found several instances of positive selection along ancestral and more recent lineages leading to these  
476 species, identifying several potential codon sites within each ortholog having experienced positive selection  
477 (Figure 2, Tables 1-2). Notably, our results regarding the presence of positive selection in the lineage  
478 ancestral to Sophophora subgenus are consistent with a recent study by Vieira et.al., and 3 specific  
479 residues (87T, 261L, 320K) were identified in both analyses (Vieira, et al. 2018). Physiochemical properties  
480 and location of these amino acid residues on the 3D structure of *DmDNMT2* and *AaDNMT2* indicate that  
481 these adaptive changes occur in four major regions of the protein (Figure 2A). Collectively, these changes



482 might influence catalytic function and inter-molecular interactions with other accessory proteins and/or  
483 nucleic acid substrates. Further work, using site-directed mutagenesis of these sites, is required to validate  
484 the importance of these residues on the ability of these DNMT2 orthologs to regulate virus infection.  
485 Notably, our CodeML analyses did not find any evidence of positive selection along lineages leading to  
486 *Aedes* DNMT2 since their divergence with *Anopheles* (Figure 1A). This is in contrast with the antiviral role  
487 of *DmDNMT2*, which could explain the presence of positive selection along this lineage. However, several  
488 sites identified in the ancestral Culicidae lineage as well as related *Anopheles* genera were found to occur  
489 within *AaDNMT2* (Figure 1A). Furthermore, heterologous expression of this ortholog in fly cells were able  
490 to restrict infectious virus production as well as the native *DmDNMT2* ortholog, indicating that the outcome  
491 is host-dependent (Figure 6). Collectively, our results suggest that several Dipteran DNMT2 orthologs may  
492 have evolved to function at the interface of host-pathogen interactions, contributing to its antiviral role in  
493 fruit flies and possibly other members of the *Drosophila* genus. Indeed, based on overall positive selection  
494 and complete conservation of these codon sites among *Drosophila*/*Sophophora*, it is conceivable that these  
495 DNMT2 orthologs confer similar antiviral effects in their respective host backgrounds (Figure 2, Tables 1-  
496 2). Given the lack of genetic tractability in these *Drosophila* species, heterologous expression of these  
497 DNMT2 orthologs in a tractable *Drosophila melanogaster* background can be used to determine their  
498 restriction properties.

#### 499 **Delineating differences between DNMT2 regulation in fruit fly and mosquitoes**

500 In addition to the presence or absence of positive selection, we identified two distinct differences in the  
501 overall protein sequence between Drosophilidae and Culicidae DNMT2. The first being an extended (7-47  
502 aa long), unstructured N-terminal end present in all DNMT2 orthologs within Culicidae species. The other  
503 difference lies in the target recognition domain, which is extended (7-11 aa long) in Drosophilidae DNMT2  
504 and is predicted to interact with the nucleic acid substrate based on past simulation studies using  
505 mammalian DNMT1 (Ye, et al. 2018). These differences also give rise to altered surface charge distribution  
506 between *DmDNMT2* and *AaDNMT2*, further signifying potential differences in inter-molecular associations  
507 and/or target specificity between these orthologs. These differences could represent unique modes of  
508 regulation between the two orthologs, a case strengthened by our results regarding the role of the  
509 *Drosophila melanogaster* protein IPOD in *DmDNMT2* regulation. IPOD is present within all members of the  
510 *Drosophila* genus, but absent in Culicidae species (Supplementary Figure 4). Notably, previous *in vivo* and  
511 *in vitro* analyses indicate that IPOD binds to the N-terminal end of *DmDNMT2* (Kunert 2005). Primary amino  
512 acid sequence composition of IPOD also indicates a vast portion of this protein to be intrinsically  
513 unstructured, suggesting a great degree of conformational flexibility that might allow extensive protein-  
514 protein interactions. Previous work has also suggested IPOD-mediated regulation of *DmDNMT2*  
515 expression. Through *in vivo* loss-of-function analyses, we show that IPOD is indeed an upstream regulator  
516 of *DmDNMT2* expression. Given that the entirety of IPOD is made up of an N-terminal signal peptidase and  
517 a C-terminal non-cytoplasmic domain, it is likely that it regulates *DmDNMT2* transcription in the nucleus.  
518 Finally, demonstrating its functional role in *DmDNMT2* regulation, we show that loss of IPOD in flies

519 colonized with *Wolbachia* phenocopy *Wolbachia*-colonized *DmDNMT2* loss-of-function mutants  
520 (Bhattacharya, et al. 2017). Consistent with our previous reports, this loss in virus inhibition occurs without  
521 any changes in endosymbiont titer. The role of IPOD as a cognate DNMT2 regulator and interaction partner  
522 is further supported by our observation that the phylogenies of *Drosophila* DNMT2 and IPOD orthologs  
523 mirror one another to a significant degree, suggesting a co-evolving relationship between these two  
524 proteins.

525 The mechanism of Culicidae DNMT2 regulation is less well defined, but likely varies between different  
526 mosquito genera. A recent study by Claudio-Piedras et al. suggest that DNMT2 in *Anopheles albimanus* is  
527 under the control of the NF- $\kappa$ B family of transcription factors (Claudio-Piedras, et al. 2019). This is in  
528 contrast to *Aedes* mosquitoes, where expression of DNMT2 is under the control of a conserved miRNA  
529 *aae-miR-2940* (miRBase Accession: MI0013489) (Zhang, et al. 2013). However, like the miRNA itself, its  
530 target mRNA sequence is unique to *Aedes* DNMT2 and are absent from ortholog transcripts from other  
531 Culicidae species and most notably, from *Drosophila* DNMT2 (Supplementary Figure 6A). Still absence of  
532 this particular miRNA target does not imply that *DmDNMT2* is not under the control of any miRNAs. *In silico*  
533 miRNA prediction with *DmDNMT2* (FBtr0110911) as a target query using miRanda predicts one highly  
534 conserved host miRNA, *dme-miR-283* (miRBase Accession ID: MI0000368), with the potential of targeting  
535 the 3' untranslated region (3'UTR) of the *DmDNMT2* gene. Incidentally, *dme-miR-283* is among the top ten  
536 most upregulated miRNAs in fly cells following alphavirus (Semilki Forest Virus, SFV) infection, both in the  
537 presence and absence of *Wolbachia* (Rainey, et al. 2016). Assuming that *dme-miR-283* downregulates  
538 *DmDNMT2* expression, the modENCODE RNA-seq treatments dataset and our previous observations  
539 indicate these results are in line with the SINV-responsive expression pattern of this miRNA and its target  
540 in adult flies (Bhattacharya, et al. 2017). It should also be noted, that while we found a single miRNA  
541 targeting *DmDNMT2*, miRanda and TargetScanFly v7.2 identified a set of three conserved *Drosophila*  
542 miRNAs targeting the 3'UTR region of multiple *Drosophila* IPOD orthologs (FBgn0030187). A subset of  
543 these miRNAs has been previously associated with regulating host innate immunity and antimicrobial  
544 responses (Supplementary Figure 6B) (Li, et al. 2017). Further work is necessary to experimentally validate  
545 the role of these miRNAs in regulating expression of their predicted targets.

#### 546 **Influence of host backgrounds on DNMT2 antiviral activity**

547 Finally, through heterologous expression of *DmDNMT2* and *AaDNMT2* in their non-native host  
548 backgrounds, we show that the antiviral activity is not unique to *DmDNMT2* but is rather a consequence of  
549 the host *Drosophila melanogaster* background, as its effect on SINV is phenocopied by heterologous  
550 *AaDNMT2* expression in the same cells, leading to a loss in infectious virus production as well as per-  
551 particle infectivity. This suggests that sequence or structural features that are unique to *DmDNMT2* are not  
552 responsible for its antiviral activity in fly cells. However, these features do indicate the requirement for  
553 specific inter-molecular interactions that is required for proper *DmDNMT2* function and specificity. This is  
554 supported by our observation that expression of *DmDNMT2* in *Aedes albopictus* mosquito cells has no  
555 effect on SINV, either antiviral or proviral, in contrast to the native *AaDNMT2* expression which leads to

556 virus “rescue” from *Wolbachia*-mediated inhibition. We postulate that this complete lack of *DmDNMT2*  
557 activity and/or specificity in this host (*Aedes albopictus*) background could be due to the absence of one or  
558 more *DmDNMT2* “co-factors” that are specific to *Drosophila* i.e. IPOD (Figure 6).

559 Our observations regarding *AaDNMT2*’s ability to function as an antiviral in fly cells suggests that any  
560 selection within *Drosophila* that differs from *Aedes* may also be due to other adaptations. Still, the sites  
561 identified to be under positive selection may contribute to *DmDNMT2*’s potency as an antiviral. Further work  
562 is required to determine if *DmDNMT2* variants carrying the replaced ancestral codons are less efficient at  
563 inhibiting viruses native to *Drosophila*, as they likely represent the source of this selection.

564 Since the exact mechanism of *DNMT2*’s antiviral role remains undefined, it is possible that these  
565 adaptations allow for functional differences of this MTase against specific viruses, host conditions or both.  
566 Notably, the viruses used in this study are alphaviruses, which are native to the *Aedes* host. The antiviral  
567 activity of both MTase orthologs against these viruses in fly cells could therefore also be due to fundamental  
568 differences in the host response to potential hypermethylation of viral and host RNA species. Indeed, while  
569 such modifications may be favorable or even necessary for alphavirus replication in the native mosquito, it  
570 might allow for virus recognition and clearance in the fly background. Further studies are required using  
571 native virus-host-MTase ortholog combinations to explore these possibilities. At the same time, based on  
572 our current experimental setup we cannot rule out the possibility that basal-level expression of the  
573 endogenous MTase has an effect on the outcomes of our heterologous-expression experiments. Further  
574 work is required to determine if heterologous expression of *AaDNMT2* can complement the absence of the  
575 native-*DmDNMT2* null fly cells, and vice versa, with regards to virus restriction or rescue, respectively.

## 576 **Materials and Methods**

### 577 **Insect and Mammalian Cell Culture**

578 JW18 *Drosophila melanogaster* cells with and without *Wolbachia* (strain *wMel*) were grown at 24 °C in  
579 Shields and Sang M3 insect media (Sigma-Aldrich) supplemented with 10% heat-inactivated fetal bovine  
580 serum (Gibco), 1% each of L-Glutamine (Corning), non-essential amino acids (Corning) and penicillin-  
581 streptomycin-antimycotic (Corning). Baby hamster kidney fibroblast (BHK-21) cells were grown at 37 °C  
582 under 5% CO<sub>2</sub> in 1X Minimal Essential Medium (Corning) supplemented with 10% heat-inactivated fetal  
583 bovine serum (Corning), 1% each of L-Glutamine (Corning), non-essential amino acids (Corning) and  
584 penicillin-streptomycin-antimycotic (Corning).

### 585 **Fly husbandry, genetic crosses and virus injections**

586 The following stocks were obtained from the Bloomington *Drosophila* Stock Center (BDSC) located at  
587 Indiana University Bloomington (<http://flystocks.bio.indiana.edu/>). *Wolbachia*-infected RNAi mutant stock  
588 60092 (*y*[1] *sc*[\*] *v*[1] *sev*[21]; *P*{*y*[+*t*7.7] *v*[+*t*1.8]=*TRiP.HMC05086*}*attP40*) was used for shRNA-mediated  
589 knock-down of IPOD gene expression by driving dsRNA expression using previously described *Act5C-Gal4*  
590 driver males (*y*<sup>1</sup> *w*<sup>\*</sup>; *P*{*w*[*Act5C-GAL4*]17*bFO1/TM6B*, *Tb*<sup>1</sup>). The homozygous *TRiP* mutant adult females  
591 colonized with *Wolbachia* were crossed to uninfected *w*; *Sco*/*Cyo* males. Virgin progeny females carrying  
592 the inducible shRNA construct were collected and age-matched (2-5 days old) before being crossed to the

593    aforementioned Act5C-Gal4 driver males. As per our previous study, *Wolbachia*-infected TRiP mutant stock  
594    42906 (y1 sc\* v1; P {TRiP.HMS02599} attP40) was used to achieve knock-down of *Mt2* gene expression  
595    by driving dsRNA expression using the aforementioned Act5C-Gal4 driver males. All fly stocks were  
596    maintained on standard cornmeal-agar medium diet supplemented with an antibiotic cocktail which  
597    comprises penicillin and streptomycin (P/S) at 25°C on a 24-hour light/dark cycle. In order to establish a  
598    systemic virus infection *in vivo*, flies were anesthetized with CO<sub>2</sub> and injected intrathoracically with 50nL of  
599    approximately 10<sup>10</sup> PFU/mL of purified Sindbis virus (SINV-nLuc) or sterile saline solution (1XPBS) using a  
600    nano-injector (Drummond Scientific). Flies were collected two days post-infection, snap frozen in liquid N<sub>2</sub>  
601    and stored at -80 °C for downstream processing. Samples for quantitative PCR and quantitative RT-PCR  
602    were homogenized in TRIzol reagent (Sigma Aldrich) and further processed for nucleic acid extractions  
603    using manufacturer's protocols.

#### 604    **DNMT2 overexpression in insect cells**

605    Expression vectors containing *Drosophila melanogaster* and *Aedes albopictus* DNMT2 orthologs used here  
606    were designed in the following manner; *Aedes albopictus* *AMt2* coding region was subcloned into PCR 2.1  
607    TOPO vector (Invitrogen) by PCR amplification of cDNA generated using reverse transcribed from total  
608    cellular RNA isolated from C636 *Aedes albopictus* cells using Protoscript II RT (NEB) and oligo-dT primers  
609    (IDT). Coding region was validated via sequencing before cloned into the pAFW expression vector (1111)  
610    (Gateway Vector Resources, DGRC), downstream of and in-frame with the 3X FLAG tag using the native  
611    restriction sites AgeI and NheI (NEB). Expression of both FLAG-tagged AaDNMT2 in mosquito cells was  
612    confirmed using qRT-PCR and Western Blots using an anti-FLAG monoclonal antibody (SAB4301135 -  
613    Sigma-Aldrich) (Fig 4A). Catalytic MTase mutant of *AMt2* (*AMt2*-C78G), was generated via site-directed  
614    mutagenesis (NEB, Q5 Site-Directed Mutagenesis Kit). using primers listed in the primer table (Table S1).  
615    *Drosophila Mt2* (FBgn0028707) cDNA clone (GM14972), obtained from DGRC  
616    (<https://dgrc.bio.indiana.edu/>) was cloned into the pAFW expression vector (1111) with an engineered Sall  
617    site (Gateway Vector Resources, DGRC) downstream of and in-frame with the 3X FLAG tag using Gibson  
618    assembly (HiFi DNA assembly mix, NEB). Expression of FLAG-tagged DNMT2 in fly cells was confirmed  
619    using qRT-PCR and Western Blots using an anti-FLAG monoclonal antibody (SAB4301135 - Sigma-  
620    Aldrich). Catalytically inactive *Mt2* (*Mt2* C78A) variant was generated via site-directed mutagenesis (NEB,  
621    Q5 Site-Directed Mutagenesis Kit) using primers listed in the primer table (Supplementary Table 1). JW18  
622    fly cells were transfected with expression constructs using Lipofectamine LTX supplemented with Plus  
623    reagent (Invitrogen) by following manufacturer's protocol. Protein expression was assessed 72 hours post  
624    transfection via Western Blot using a monoclonal antibody against the FLAG epitope (Sigma) (Figure 5A,  
625    D). For every western blot experiment, monoclonal anti-β-actin antibody was used to probe cellular β-actin  
626    levels, which was used as loading control.

#### 627    **Virus infection in cells**

628    Viral titers were determined using standard plaque assays on baby hamster kidney fibroblast (BHK-21)  
629    cells. Cells were fixed 48 hours post infection using 10% (v/v) formaldehyde and stained with crystal violet

630 to visualize plaques. Virus particles were determined by quantifying viral genome copies via quantitative  
631 RT-PCR using primers targeting the SINV E1 gene (See Supplementary Table 1 for primer details) and  
632 standard curves made from linearized infectious clone sequences containing full-length SINV genome.  
633 Primer efficiencies for this primer set was determined in our previous study (Bhattacharya, et al. 2020).

#### 634 **Real-time quantitative PCR and RT-PCR analyses**

635 Total DNA and RNA were extracted from samples using TRIzol reagent (Sigma Aldrich) according to  
636 manufacturer's protocols. Synthesis of complementary DNA (cDNA) was carried out using MMuLV Reverse  
637 Transcriptase (NEB) and random hexamer primers (Integrated DNA Technologies). Negative (no RT or no  
638 gDNA or cDNA synthesized from mock infected cell supernatants) controls were used for each target per  
639 reaction. Quantitative PCR or RT-PCR analyses were performed using Brilliant III SYBR green QPCR  
640 master mix (Bioline) with gene-specific primers on a Applied Bioscience StepOnePlus qPCR machine (Life  
641 Technologies). All primer sets were designed based on information present in existing literature [14,17,20].  
642 Query gene expression levels were normalized to the endogenous 18S rRNA expression using the delta-  
643 delta comparative threshold method ( $\Delta\Delta CT$ ) (Supplementary Table 1).

#### 644 **Phylogenetic Analyses**

645 Maximum likelihood trees were constructed using RAxML using the Le-Gascuel (Bhattacharya, et al.) amino  
646 acid substitution model with 100 bootstrap replicates (Stamatakis 2014). Multiple sequence alignments  
647 were generated using Clustal Omega. Final trees were visualized using FigTree v1.4.4.

#### 648 **CodeML analyses**

649 Tree topologies were obtained using RAxML with aligned codon-based nucleotide sequences. The “-m  
650 GTRGAMMA” model was used with rapid bootstrap analysis and search for the best tree (option: -f a). The  
651 codeML null and alternative branch-site models were run for each individual branch in the tree as  
652 foreground independently (Yang 2007). In the alternative model, the branch site model allows a class of  
653 sites in the foreground branch to have a dN/dS > 1. In the text we refer generally to dN/dS as  $\omega$  and to the  
654 dN/dS > 1 class as  $\omega_2$ . Convergence issues were addressed by rerunning analyses with different values  
655 for Small\_Diff. Signs of convergence issues include: 1) lnL values worse than the M1a NearlyNeutral site  
656 model, 2) the first two site classes having proportions of zero, 3) the null model having better lnL than the  
657 alternative model, 4) in the alternative model, lnL values worse than expected given estimated site posterior  
658 probabilities.

#### 659 **Inter-protein co-evolution analyses**

660 Co-evolution of Drosophila DNMT2 and IPOD orthologs was performed using multiple sequence alignments  
661 using the MirrorTree Server (Ochoa and Pazos 2010). Robinsin-Foulds distances was calculated to  
662 measure the dissimilarity between the topologies of unrooted IPOD and DNMT2 phylogenetic trees using  
663 the Visual TreeCmp webserver (Bogdanowicz, et al. 2012; Bogdanowicz and Giaro 2017). The following  
664 optional parameters were selected for Matching Split and Weighted Robinsin Foulds aka. RFWeighted (0.5)  
665 and RF (0.5) analyses: Normalized distances, Prune trees (to allow for partially overlapping sets of taxa)  
666 and Zero weights allowed.



667 ***In silico* miRNA prediction**

668 Prediction of miRNAs targeting *Drosophila* Mt2 (FBgn0028707) and IPOD (FBgn0030187) was carried out  
669 using two independent miRNA prediction servers, TargetScanFly v7.2 and microrna.org (Agarwal, et al.  
670 2018; Kozomara, et al. 2019). The latter combines miRanda target prediction with an additional mirSVR  
671 target downregulation likelihood score (Betel, et al. 2010). Accession numbers of miRNAs predicted in this  
672 study was obtained from miRBase.

673 **Protein Conservation**

674 Protein conservation was determined with the Protein Residue Conservation Prediction tool  
675 (<http://compbio.cs.princeton.edu/conservation/index.html>;) (Dosztányi, et al. 2005; Dosztányi 2018).  
676 Multiple sequence alignment of amino acid sequences carried out using Clustal Omega were used as input,  
677 while Shannon entropy scores were selected as output, alongside a window size of zero, and sequence  
678 weighting set to “false.” Conservation was subsequently plotted using GraphPad Prism 8. DNMT2 motif  
679 regions were defined as per described in previous studies (Falckenhayn, et al. 2016). For IPOD, domains  
680 were defined based on Pfam and InterPro domain prediction results obtained using *Drosophila*  
681 *melanogaster* IPOD as an input query (Capra and Singh 2007; Kelley, et al. 2015).

682 **Homology Modelling of DNMT2 orthologs**

683 Template-based comparative modeling of DNMT2 orthologs from *Drosophila melanogaster*, *Aedes*  
684 *albopictus* and *Anopheles gambiae* was performed using the intensive modelling approach in Protein  
685 Homology/Analogy Recognition Engine 2 (Phyre2) [28]. Protein structures were visualized using PyMOL  
686 (The PyMOL Molecular Graphics System, Version 1.2r3pre. Schrödinger, LLC).

687 **Inter-protein co-evolution analyses**

688 Co-evolution of *Drosophila* DNMT2 and IPOD orthologs was performed using multiple sequence alignments  
689 using the MirrorTree Server (Ochoa and Pazos 2010). Robinsin-Foulds distances was calculated to  
690 measure the dissimilarity between the topologies of unrooted IPOD and DNMT2 phylogenetic trees using  
691 the Visual TreeCmp webserver (Bogdanowicz, et al. 2012; Bogdanowicz and Giaro 2017). The following  
692 optional parameters were selected for Weighted Robinsin Foulds, RFWeighted (0.5) and RF (0.5) analyses:  
693 Normalized distances, Prune trees and Zero weights allowed.

694 **Statistical analyses of experimental data**

695 All statistical tests were conducted using GraphPad Prism 8 (GraphPad Software Inc., San Diego, CA).  
696 Details of statistical tests for each experiment can be found in the results section and the associated figure  
697 legends.

698 **Graphics**

699 Graphical assets made in BioRender - biorender.com.

700

701 **Acknowledgements**

702 We would like to thank Dr. Suchetana Mukhopadhyay for her critical and helpful suggestions regarding  
703 interpretations of data included in this manuscript. We would like to thank members of the Hardy, Newton,

704 Danthi, Mukhopadhyay and Patton labs for their critical input and thoughtful discussions. This project was  
 705 supported by funding from NIH NIAID to ILGN (R01 AI144430) and to ILGN and RWH (R21 AI153785)

706 **Conflicts of interest**

707 The authors declare no conflicts of interest associated with the body of work presented in this paper.

708 **Data availability**

709 All sequences used in this manuscript are publicly available and accession numbers provided in  
 710 Supplementary Materials.

711

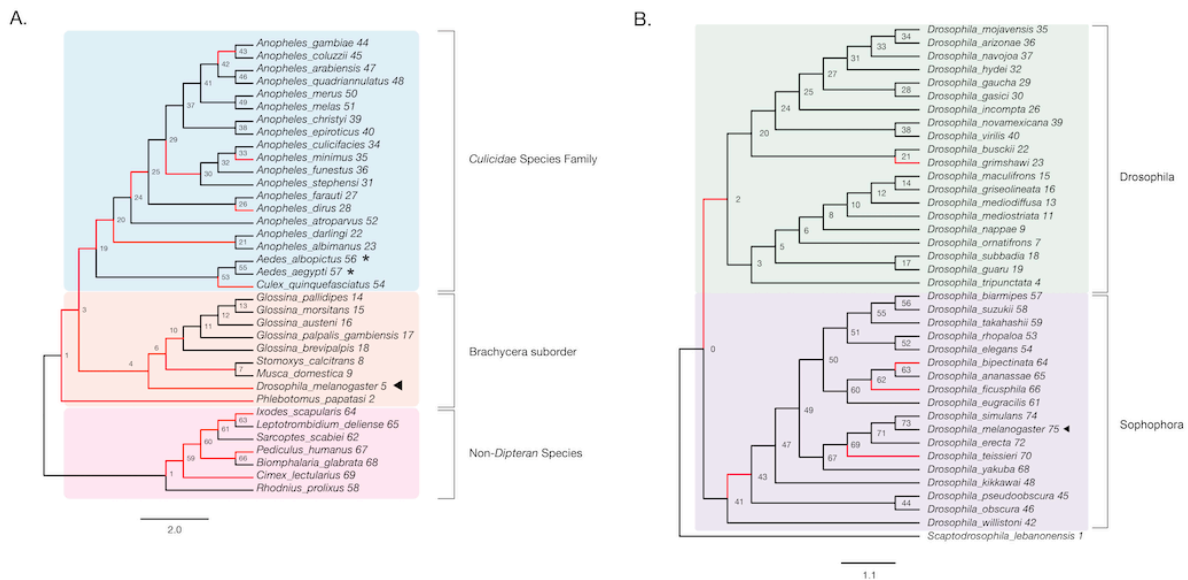

712

713

714 **Figure 1. Evidence of adaptive evolution in DNMT2 orthologs.** Branches numbered

715 for reference in main text and Table 1. (A) Branch-site tests were conducted to detect

716 positive selection ( $\omega_2 > 1$ ,  $\omega = dN/dS$ ) across lineages of DNMT2 orthologs belonging to

717 different species within the order Diptera (clades highlighted in light blue and orange for

718 Culicidae family and the Brachycera suborder, respectively) and non-Dipteran (clades

719 highlighted in light pink) animals. Maximum-likelihood (Deddouche, et al.) trees

720 generated based on DNMT2 coding sequences using RAxML were used for the CodeML

721 analyses. (A) Significant evidence (see Table 1 for details) of positive selection in DNMT2

722 is present along branches representing multiple insect species ( $\omega_2 > 1$ ). These include

723 several *Anopheles* and one *Culex* mosquito species, as well as several other Dipteran fly

724 species Species whose DNMT2 ortholog(s) have been characterized as having anti-

725 viral/microbial properties are indicated by black arrowheads, while those that have been  
 726 described as having pro-viral properties are indicated by black asterisks. (B) Significant  
 727 evidence of positive selection is present along the ancestral branch leading to the  
 728 subgroup *Sophophora* (clades highlighted in light purple) and along branches leading to  
 729 4 *Drosophila* species. Taxa with adjacent black arrowheads represent DNMT2 ortholog  
 730 with known anti-viral or anti-microbial activity. For both panels, branches under positive  
 731 selection ( $\omega > 1$ ) are represented in red.

732

733

734 **Table 1. CodeML analyses result of positive selection among DNMT2 orthologs.**

735 Positively Selected Sites represent amino acid codon positions with  $\omega > 1$  ( $\omega = dN/dS$ ,  
 736 BEB Posterior Probability  $> 0.80$ ). Underlined codon sites represent those present in the  
 737 ancestral lineage with BEB Posterior Probability  $> 95\%$ .

738

| Species                                                                                                              | 2ln $\lambda$ | P Value   | Amino Acid Sites                                            | Branch (No. of Taxa) |
|----------------------------------------------------------------------------------------------------------------------|---------------|-----------|-------------------------------------------------------------|----------------------|
| All Dipteran species                                                                                                 | 5.4           | 0.01      | <u>44 G, 55 G</u>                                           | 3 (20)               |
| <i>Culex quinquefasciatus</i>                                                                                        | 18.7          | 0.000008* | <u>17 E, 24 K, 46 N, 323 S</u>                              | 54 (1)               |
| <i>Anopheles dirus</i>                                                                                               | 2.9           | 0.044     | <u>274 L</u>                                                | 28 (1)               |
| <i>Anopheles darlingi</i><br><i>Anopheles albimanus</i>                                                              | 8.7           | 0.002     | <u>248 S, 263 E</u>                                         | 21 (2)               |
| <i>Anopheles</i> sub-genus                                                                                           | 11.0          | 0.0005*   | <u>13 H, 14 F</u>                                           | 20 (15)              |
| Culicidae Species Family                                                                                             | 10.1          | 0.0007*   | <u>84 F, 103 D, 105 I, 147 H, 208 K, 222C, 309 C, 328 E</u> | 19 (17)              |
| <i>Anopheles minimus</i><br><i>Anopheles culicifacies</i><br><i>Anopheles funestus</i><br><i>Anopheles stephensi</i> | 9.4           | 0.001     | <u>24 K</u>                                                 | 30 (4)               |
| <i>Anopheles minimus</i>                                                                                             | 4.0           | 0.02      | –                                                           | 35 (1)               |
| <i>Anopheles gambiae</i><br><i>Anopheles coluzzi</i>                                                                 | 5.0           | 0.012     | –                                                           | 42 (2)               |
| <i>Anopheles gambiae</i> sub-genus                                                                                   | 3.5           | 0.009     | –                                                           | 25 (12)              |
| <i>Drosophila melanogaster</i><br><i>Stomoxys calcitrans</i><br><i>Musca domestica</i><br><i>Glossina sp.</i>        | 6.1           | 0.007     | <u>23 Y, 78 F</u>                                           | 4 (8)                |
| <i>Drosophila melanogaster</i>                                                                                       | 4.2           | 0.02      | <u>223 T, 226 S, 228 S, 255 F</u>                           | 5 (1)                |
| <i>Glossina sp.</i>                                                                                                  | 7.6           | 0.003     | <u>100 D, 150 G, 214 K</u>                                  | 10 (5)               |
| <i>Stomoxys calcitrans</i><br><i>Musca domestica</i><br><i>Glossina sp.</i>                                          | 8.8           | 0.001     | <u>51 S, 55 S, 123 Q, 208 K</u>                             | 6 (7)                |
| <i>Stomoxys calcitrans</i><br><i>Musca domestica</i>                                                                 | 3.2           | 0.04      | <u>26 V</u>                                                 | 7 (2)                |

739

740

741

742

743

744

745

746

747

748

749

750

751

752 **Table 2. CodeML analyses result of positive selection among Drosophilid DNMT2**

753 **orthologs.** Positively Selected Sites represent amino acid codon positions with  $\omega > 1$  ( $\omega$

754 =  $dN/dS$ , BEB Posterior Probability > 0.95). *Drosophila melanogaster* taxa and

755 associated amino acid sites are represented in bold. The codon sites within parenthesis

756 relate to the positions for the same sites on the Dipteran multiple sequence alignment

757 used in CodeML analyses for Table 1 and Figure 1A.

758

| Species                                                                                                                                                                                                                                                                                                                                                                                                                                                                                                                                                                                                                           | 2lnλ | P Value | Amino Acid Sites                           | Branch (No. of Taxa) |
|-----------------------------------------------------------------------------------------------------------------------------------------------------------------------------------------------------------------------------------------------------------------------------------------------------------------------------------------------------------------------------------------------------------------------------------------------------------------------------------------------------------------------------------------------------------------------------------------------------------------------------------|------|---------|--------------------------------------------|----------------------|
| <i>Drosophila biarmipes</i><br><i>Drosophila suzukii</i><br><i>Drosophila takahashii</i><br><i>Drosophila rhopaloa</i><br><i>Drosophila elegans</i><br><i>Drosophila bipectinata</i><br><i>Drosophila ananassae</i><br><i>Drosophila ficusphila</i><br><i>Drosophila eugracilis</i><br><i>Drosophila simulans</i><br><b><i>Drosophila melanogaster</i></b><br><i>Drosophila erecta</i><br><i>Drosophila teissieri</i><br><i>Drosophila yakuba</i><br><i>Drosophila kikkawai</i><br><i>Drosophila pseudoobscura</i><br><i>Drosophila obscura</i><br><i>Drosophila willistoni</i>                                                   | 8.2  | 0.002   | <u>90 (87) T, 263 (261) L, 325 (320) K</u> | 41 (18)              |
| <i>Drosophila mojavensis</i><br><i>Drosophila arizonae</i><br><i>Drosophila navajoa</i><br><i>Drosophila hydei</i><br><i>Drosophila gaucha</i><br><i>Drosophila gasci</i><br><i>Drosophila incompta</i><br><i>Drosophila novamexicana</i><br><i>Drosophila virilis</i><br><i>Drosophila busckii</i><br><i>Drosophila grimshawi</i><br><i>Drosophila maculifrons</i><br><i>Drosophila griselolineata</i><br><i>Drosophila mediodiffusa</i><br><i>Drosophila mediotriata</i><br><i>Drosophila nappae</i><br><i>Drosophila ornatifrons</i><br><i>Drosophila subbadia</i><br><i>Drosophila guaru</i><br><i>Drosophila tripunctata</i> | 3.7  | 0.02    | <u>96 D</u>                                | 2 (20)               |
| <i>Drosophila bipectinata</i>                                                                                                                                                                                                                                                                                                                                                                                                                                                                                                                                                                                                     | 5.2  | 0.01    | <u>182 M, 196 A</u>                        | 64 (1)               |
| <i>Drosophila ficusphila</i>                                                                                                                                                                                                                                                                                                                                                                                                                                                                                                                                                                                                      | 3.0  | 0.04    | <u>179 W</u>                               | 66 (1)               |
| <i>Drosophila teissieri</i>                                                                                                                                                                                                                                                                                                                                                                                                                                                                                                                                                                                                       | 6.1  | 0.007   | <u>58 S</u>                                | 70 (1)               |
| <i>Drosophila grimshawi</i>                                                                                                                                                                                                                                                                                                                                                                                                                                                                                                                                                                                                       | 3.3  | 0.035   | <u>107 E</u>                               | 23 (1)               |

759

760

761



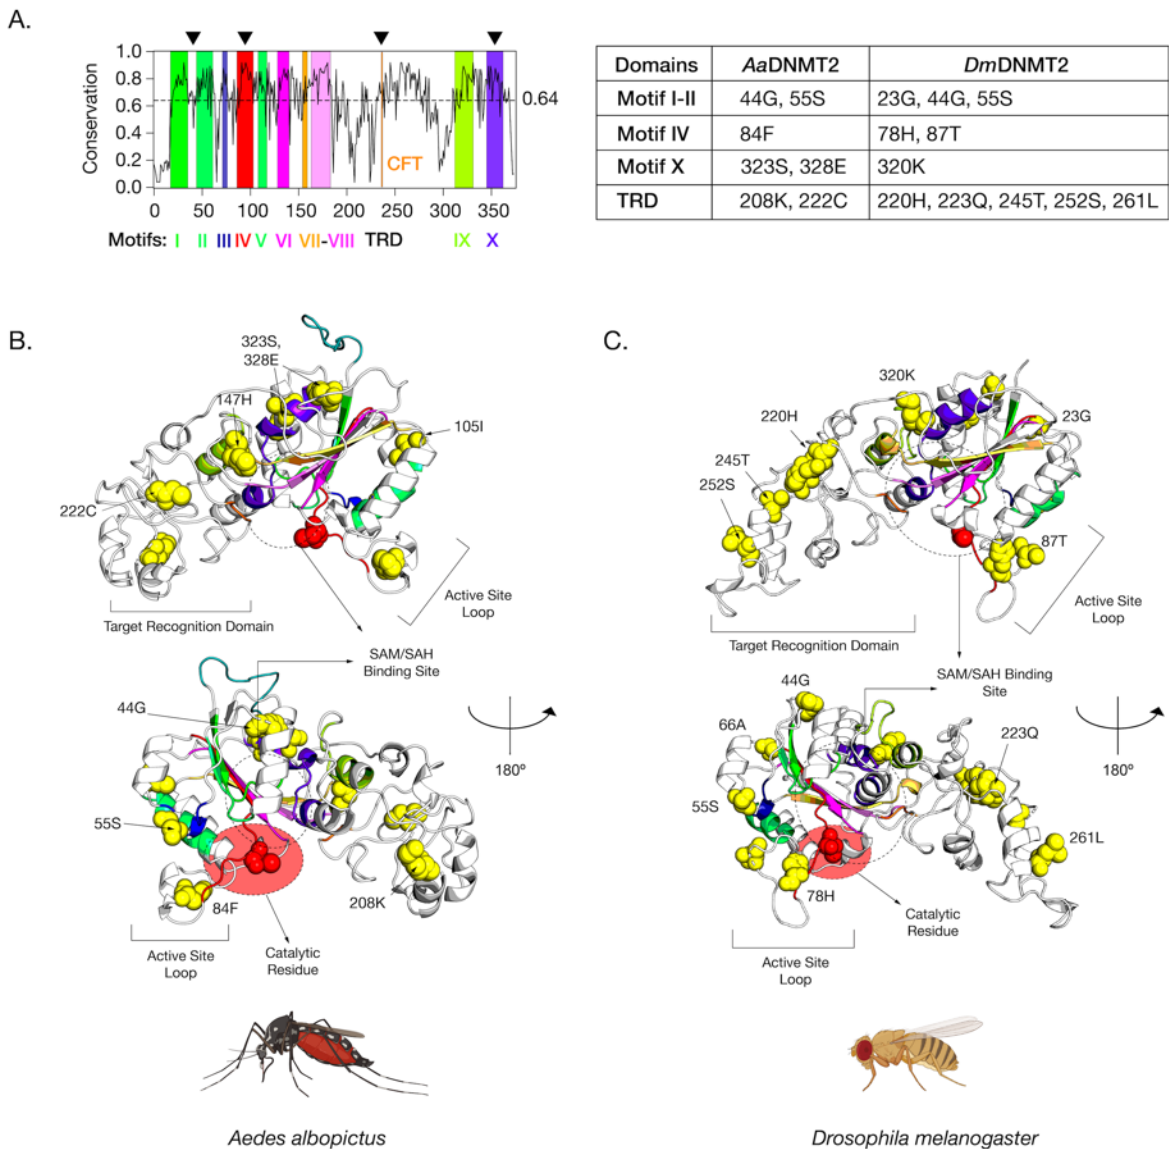

762

763

764 **Figure 2. Amino-acid positions in *Drosophila melanogaster* DNMT2 potentially**  
 765 **under positive selection.** (A) Shannon conservation plot representing the degree of  
 766 conservation (Y-axis) of DNMT2 orthologs present at every amino acid position (X-axis)  
 767 across within DNMT2 orthologs from mosquitoes (Culicidae) and fruit flies (*Drosophila*).  
 768 Colored boxes represent known DNMT2 functional motifs and domains involved in  
 769 catalytic activity and target recognition (CFT). The mean conservation score (64%)  
 770 across all amino acid positions is represented by the horizontal dotted line. Black

771 arrows present on the top represent four major regions containing a majority of amino  
 772 acid positions with evidence of positive selection and high posterior probability values  
 773 (> 95%). These individual amino acids are also represented in the accompanying table  
 774 to the right. (B, C) Spatial distribution of sites unique to each family are represented as  
 775 yellow spheres on ribbon models of (B) *Aedes albopictus* (left, 9 sites) and (C)  
 776 *Drosophila melanogaster* (right, 10 sites) DNMT2 structures visualized in PyMOL 2.4  
 777 (Schrödinger, LLC). The catalytically active cysteine residue (Cys, C) is represented in  
 778 red. Predicted substrate i.e. S-adenosyl methionine (SAM) or S-adenosyl homocysteine  
 779 (SAH) binding region is shown as a dashed oval. Functionally important active-site loop  
 780 and target recognition domain are also indicated on each structure. The lower  
 781 structures are rotated 180° relative to the upper ones.  
 782  
 783  
 784

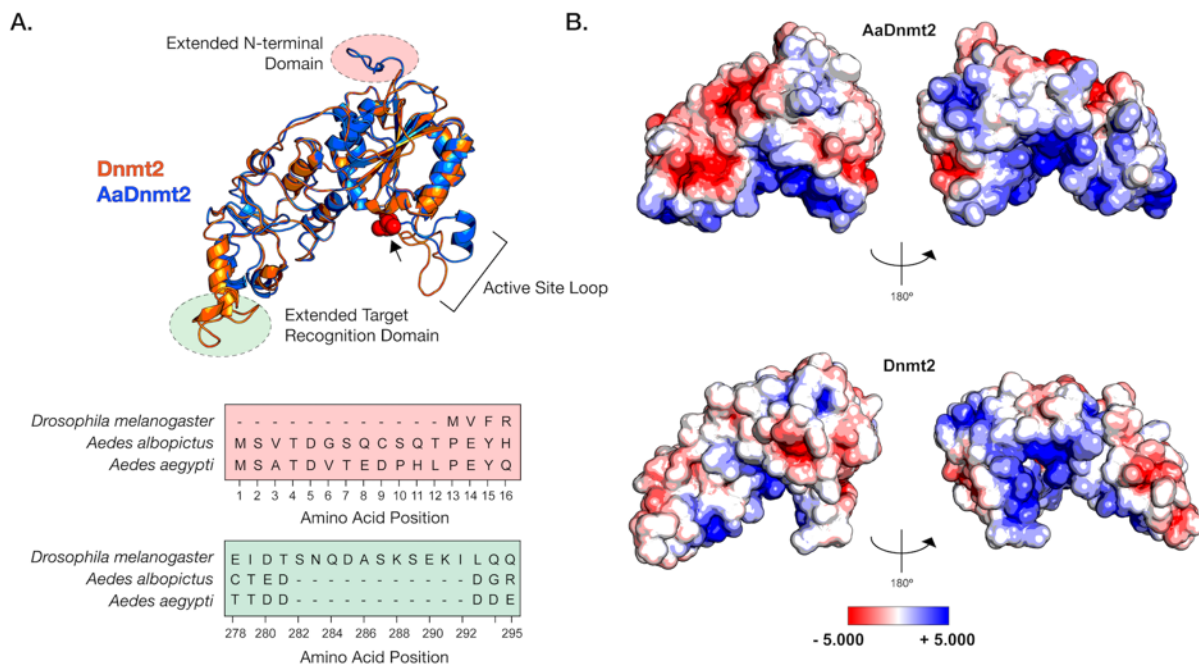

785  
 786  
 787 **Figure 3. Structural differences between *Drosophila* and *Aedes* DNMT2 orthologs.**  
 788 Structures of DNMT2 orthologs from *Drosophila melanogaster* (*Dm*DNMT2) and *Aedes*



808 multiple sequence alignment of *IPOD* nucleotide sequences. Sequence of the *IPOD*  
809 orthologs from *Lucilia cuprina*, *Musca domestica* and *Sarcophaga bullata* were used as  
810 outgroups. Scale bar represent branch lengths. (B) Inter-protein co-evolutionary  
811 analyses of DNMT2 and IPOD orthologs was performed using MirrorTree and TreeCmp  
812 software packages. Red, dashed lines connect the same *Drosophila* taxon. (C) Shannon  
813 conservation plot representing the degree of conservation (Y-axis) of IPOD orthologs  
814 present at every amino acid position (X-axis) across *Drosophilids*. Mean conservation  
815 score (0.46) across all amino acid positions is indicated by the horizontal dashed line.  
816 Colored boxes represent three InterPro domains identified across all IPOD orthologs in  
817 *Drosophilids*, including the N-terminal signal peptide (depicted in orange), followed by a  
818 C-terminal non-cytoplasmic domain (depicted in white) consisting of a conserved  
819 domain of unknown function (DUF4766, depicted in yellow) and a glycine-rich disordered  
820 region (depicted in green) present at the C-terminal end. (D,E) *IPOD* is an upstream  
821 regulator of *Mt2* expression in *Drosophila melanogaster*. (D) *IPOD* expression was  
822 knocked down in *Wolbachia wMel*-colonized *Drosophila melanogaster* (TRiP line#  
823 60092) by driving expression of a targeting short-hairpin RNA (shRNA) against the target  
824 mRNA. Relative expression of the target *IPOD* mRNA and *Mt2* mRNA was assessed via  
825 quantitative RT-PCR using total RNA derived from age-matched females. Siblings  
826 lacking the shRNA was used as the negative control. Two-tailed t-tests on log-  
827 transformed values; *IPOD*:  $p < 0.05$ ,  $t = 3.678$ ,  $df = 8.00$ , *Mt2*:  $p < 0.05$ ,  $t = 2.454$ ,  $df =$   
828  $8.00$ . Error bars represent standard error of mean (SEM) of experimental replicates ( $n=5$ )  
829 (E) *Mt2* expression was knocked down in *Wolbachia wMel*-colonized *Drosophila*  
830 *melanogaster* by driving expression of a targeting short-hairpin RNA (shRNA) against the  
831 target mRNA. Relative expression of the target *Mt2* mRNA and *IPOD* mRNA was  
832 assessed via quantitative RT-PCR using total RNA derived from age-matched females.  
833 Siblings lacking the shRNA was used as the negative control. Two-tailed t-tests on log-  
834 transformed values; *Mt2*:  $p < 0.01$ ,  $t = 2.576$ ,  $df = 12.00$ , *IPOD*:  $p = 0.717969$ ,  $t = 0.3686$ ,  
835  $df = 14.00$ . Error bars represent standard error of mean (SEM) of experimental replicates  
836 ( $n=6-8$ ). (F) Effect of *IPOD* knockdown on *Wolbachia*-mediated virus inhibition. Age-  
837 matched *Wolbachia*-colonized female flies either wild-type or expressing *IPOD*-targeting

838 shRNA were intrathoracically injected with SINV-nLuc virus. At indicated times post  
839 infection (X-axis), flies were harvested and snap frozen prior to homogenization.  
840 Homogenized lysates were used to measure luciferase expression (RLU, Y-axis) which  
841 was subsequently used as a proxy to quantify virus replication. Two-way ANOVA of  
842 multivariate comparisons with Sidak's post-hoc test; *IPOD* knockdown:  $p < 0.01$ , Time:  
843  $p < 0.01$ . Error bars represent standard error of mean (SEM) of experimental replicates  
844 ( $n=3$ /time point). \* $p < 0.05$ , \*\* $p < 0.01$ , ns = not-significant.

845  
846  
847  
848  
849  
850

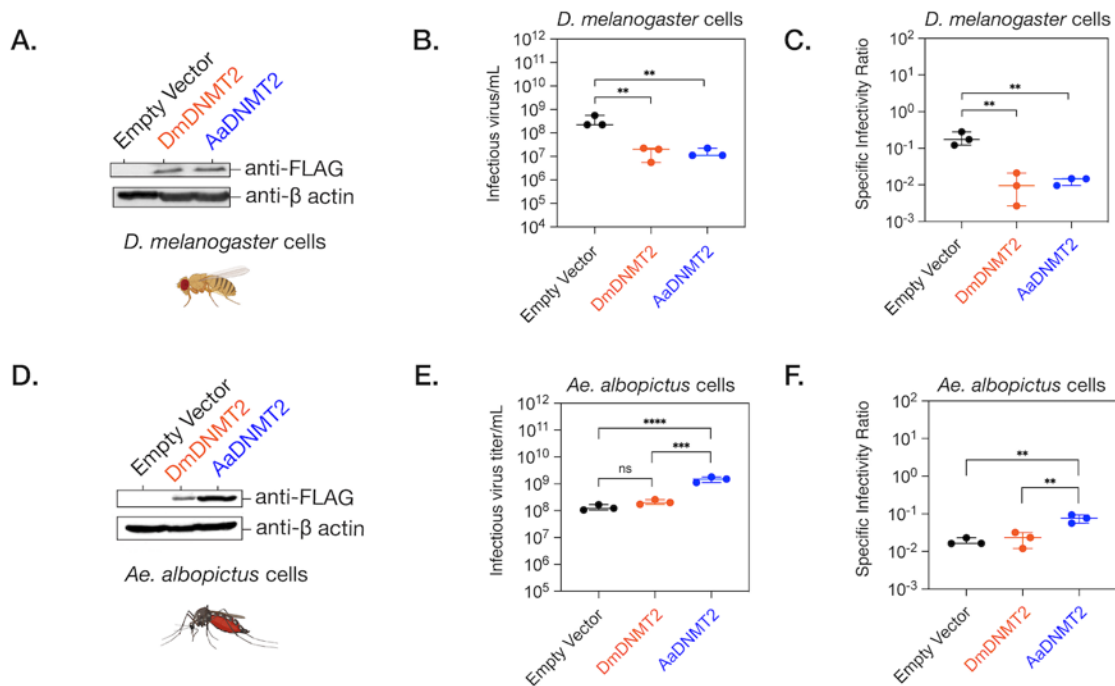

851  
852

853 **Figure 5. Effect of DNMT2 orthologs on virus replication is host-dependent.** (A)  
854 *Drosophila melanogaster* derived JW18 cells (without *Wolbachia*) were transfected with



855 plasmid constructs expressing epitope (FLAG) tagged versions of either the native fly  
856 (*DmDNMT2*, depicted in orange) or the non-native mosquito (*AaDNMT2*, depicted in  
857 blue) orthologs. Empty vector carrying only the FLAG-tag was used as a negative control  
858 (depicted in black). Protein expression was assessed 72 hours post transfection via  
859 Western Blot using antibodies against the FLAG-epitope. Cellular  $\beta$ -actin protein  
860 expression, probed using anti- $\beta$ -actin antibody, was used as loading control. (B) 72  
861 hours post transfection, JW18 cells expressing either the empty vector, the native  
862 DNMT2 (*DmDNMT2*) or the non-native DNMT2 (*AaDNMT2*) were challenged with SINV  
863 at MOI of 10 particles/cell. Cell supernatants were collected 48 hours post infection and  
864 infectious virus production was assessed via standard plaque assays on mammalian  
865 fibroblast BHK-21 cells. One-way ANOVA with Tukey's post hoc test for multiple  
866 comparisons: Empty Vector vs *DmDNMT2*:  $p = 0.0016$ , Empty Vector vs *AaDNMT2*:  $p =$   
867  $0.0017$ , *DmDNMT2* vs *AaDNMT2*:  $p = 0.9971$ . Error bars represent standard error of the  
868 mean of 3 independent experiments. (C) Specific infectivity ratios of progeny SINV  
869 derived from JW18 cells either the empty vector, the native DNMT2 (*DmDNMT2*) or the  
870 non-native DNMT2 (*AaDNMT2*) was calculated as the ratio of infectious virus titer  
871 (infectious particles) and total viral genome copies (total virus particles) present in  
872 supernatants collected 72 hours post infection. One-way ANOVA with Tukey's post hoc  
873 test for multiple comparisons: Empty Vector vs *DmDNMT2*:  $p = 0.0030$ , Empty Vector vs  
874 *AaDNMT2*:  $p = 0.0066$ , *DmDNMT2* vs *AaDNMT2*:  $p = 0.6951$ . Error bars represent  
875 standard error of the mean of 3 independent experiments. (D) *Aedes albopictus* derived  
876 C636 cells (without *Wolbachia*) were transfected with plasmid constructs expressing  
877 epitope (FLAG) tagged versions of either the native fly (*DmDNMT2*, depicted in orange)  
878 or the non-native mosquito (*AaDNMT2*, depicted in blue) orthologs. Empty vector  
879 carrying only the FLAG-tag was used as a negative control (depicted in black). Protein  
880 expression was assessed 72 hours post transfection via Western Blot using antibodies  
881 against the FLAG-epitope. Cellular  $\beta$ -actin protein expression, probed using anti- $\beta$ -actin  
882 antibody, was used as loading control. (E) 72 hours post transfection, *Aedes albopictus*  
883 derived C710 cells (colonized with *w*Stri *Wolbachia* strain) expressing either the empty  
884 vector, the native DNMT2 (*DmDNMT2*) or the non-native DNMT2 (*AaDNMT2*) were

885 challenged with SINV at MOI of 10 particles/cell. Cell supernatants were collected 48  
886 hours post infection and infectious virus production was assessed via standard plaque  
887 assays on mammalian fibroblast BHK-21 cells. One-way ANOVA with Tukey's post hoc  
888 test for multiple comparisons: Empty Vector vs *DmDNMT2*:  $p = 0.0937$ , Empty Vector vs  
889 *AaDNMT2*:  $p < 0.0001$ , *DmDNMT2* vs *AaDNMT2*:  $p = 0.0001$ . Error bars represent  
890 standard error of the mean of 3 independent experiments. (F) Specific infectivity ratios  
891 of progeny SINV derived from JW18 cells either the empty vector, the native DNMT2  
892 (*DmDNMT2*) or the non-native DNMT2 (*AaDNMT2*) was calculated as the ratio of  
893 infectious virus titer (infectious particles) and total viral genome copies (total virus  
894 particles) present in supernatants collected 72 hours post infection. One-way ANOVA  
895 with Tukey's post hoc test for multiple comparisons: Empty Vector vs *DmDNMT2*:  $p =$   
896  $0.8969$ , Empty Vector vs *AaDNMT2*:  $p = 0.0060$ , *DmDNMT2* vs *AaDNMT2*:  $p = 0.0095$ .  
897 Error bars represent standard error of mean of 3 independent experiments. \*\*\*\* $p <$   
898  $0.0001$ , \*\*\* $p < 0.001$ , \*\* $p < 0.01$ , ns = not-significant.

899

900

901

902

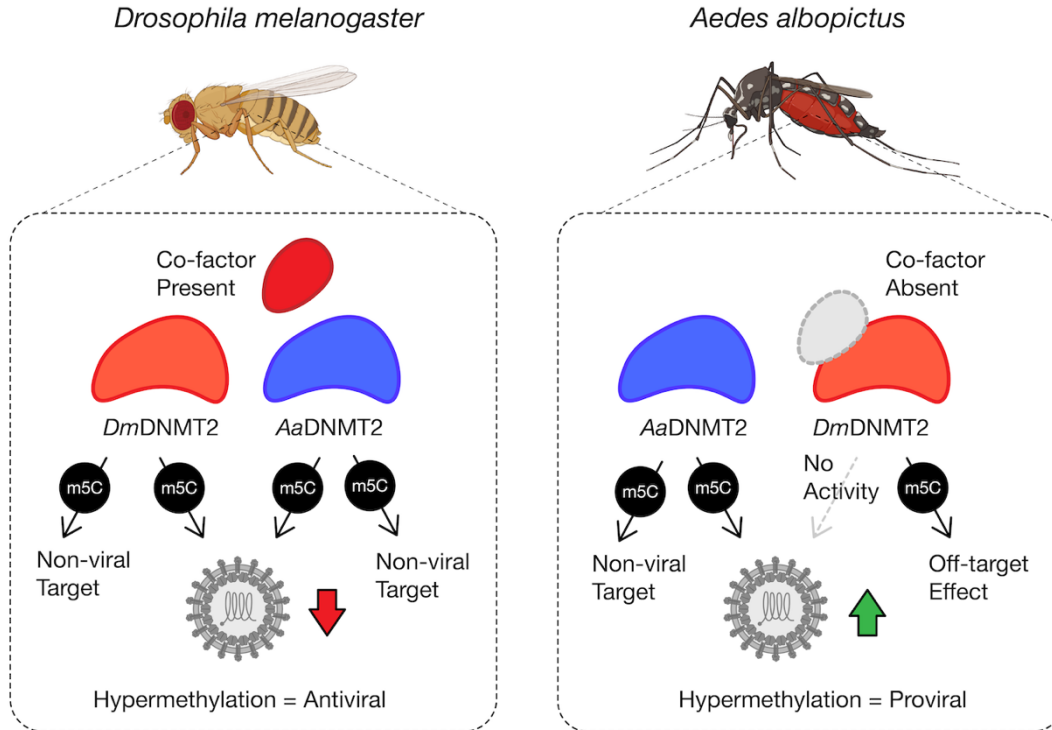

903

904 **Figure 6. Model schematic of *DmDNMT2* and *AaDNMT2* activity.** Heterologous

905 expression of either *DmDNMT2* or *AaDNMT2* in *Drosophila melanogaster* derived JW18

906 cells leads to virus inhibition, likely as a consequence of hypermethylation of a viral

907 and/or host target. In this case, *DmDNMT2* function is potentially aided by the presence

908 of an unidentified co-factor. Heterologous expression of *AaDNMT2* in *Wolbachia*-

909 colonized *Aedes albopictus* cells leads to the rescue of virus inhibition, likely due to

910 hypermethylation of a viral and/or host target. In contrast, *DmDNMT2* expression in

911 these cells has no observable effect on virus replication suggesting either a loss in MTase

912 activity or potential off-target effects. This result could be due to the absence of

913 *DmDNMT2*'s cognate interaction partner(s) or co-factor(s) that are unique to *Drosophila*

914 and are thus absent in *Aedes albopictus* cells.

915

916

917

918

919

920

921

922

923

924

925

926

927

928

929 **SUPPLEMENTARY FIGURES:**

930

931

932



947 (see Tables 1 and 2 for details) and are represented in bold letters. Catalytic Cysteine  
948 (Cys, C) residue within Motif IV is represented in red, bold letters. DNA/RNA binding CFT  
949 Motif is represented in orange, bold letters.  
950  
951

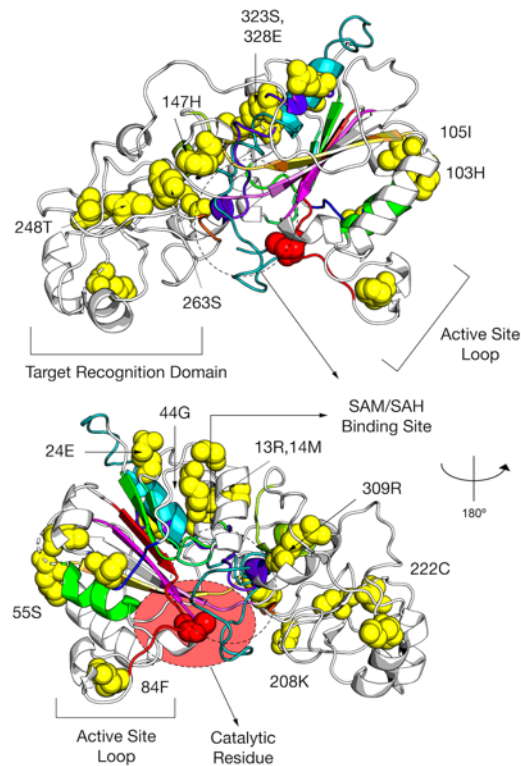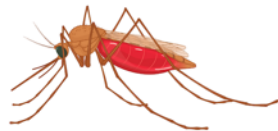

952  
953 **Supplementary Figure 2. Amino acid sites under positive selection in *Anopheles*.**  
954 Amino acid positions with evidence of positive selection and high posterior probability  
955 values ( $> 95\%$ ) were identified within DNMT2 orthologs from mosquitoes (Culicidae,  
956 Figure 1A, Table 1). Spatial distribution of 16 sites unique to *Anopheles darlingi*, which



957 include sites present in ancestral branches (3,19,20,21, Table 1) are represented as  
 958 yellow spheres on ribbon model of *Anopheles darlingi* DNMT2 structure visualized in  
 959 PyMOL 2.4 (Schrödinger, LLC). Catalytically active cysteine residue (Cys, C) is  
 960 represented in red. Predicted substrate i.e. S-adenosyl methionine (SAM) or S-adenosyl  
 961 homocysteine (SAH) binding sites are indicated in oval with dashed outline. Functionally  
 962 important active-site loop and target recognition domain are also indicated on each  
 963 structure. The rotation symbol reflects structural features viewed 180° apart along the  
 964 vertical axis.  
 965

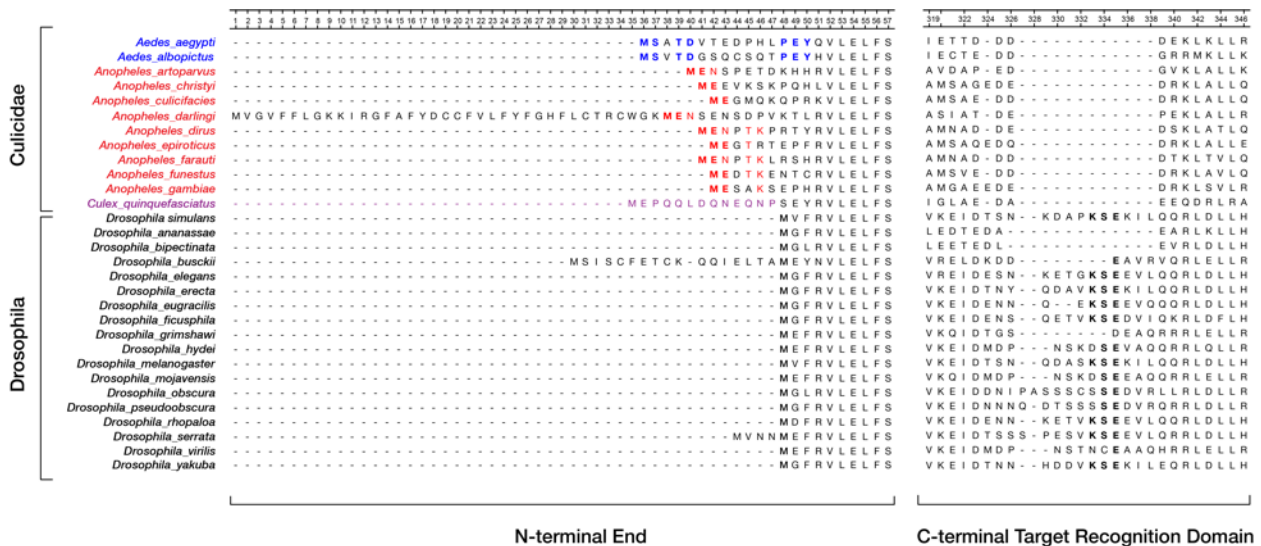

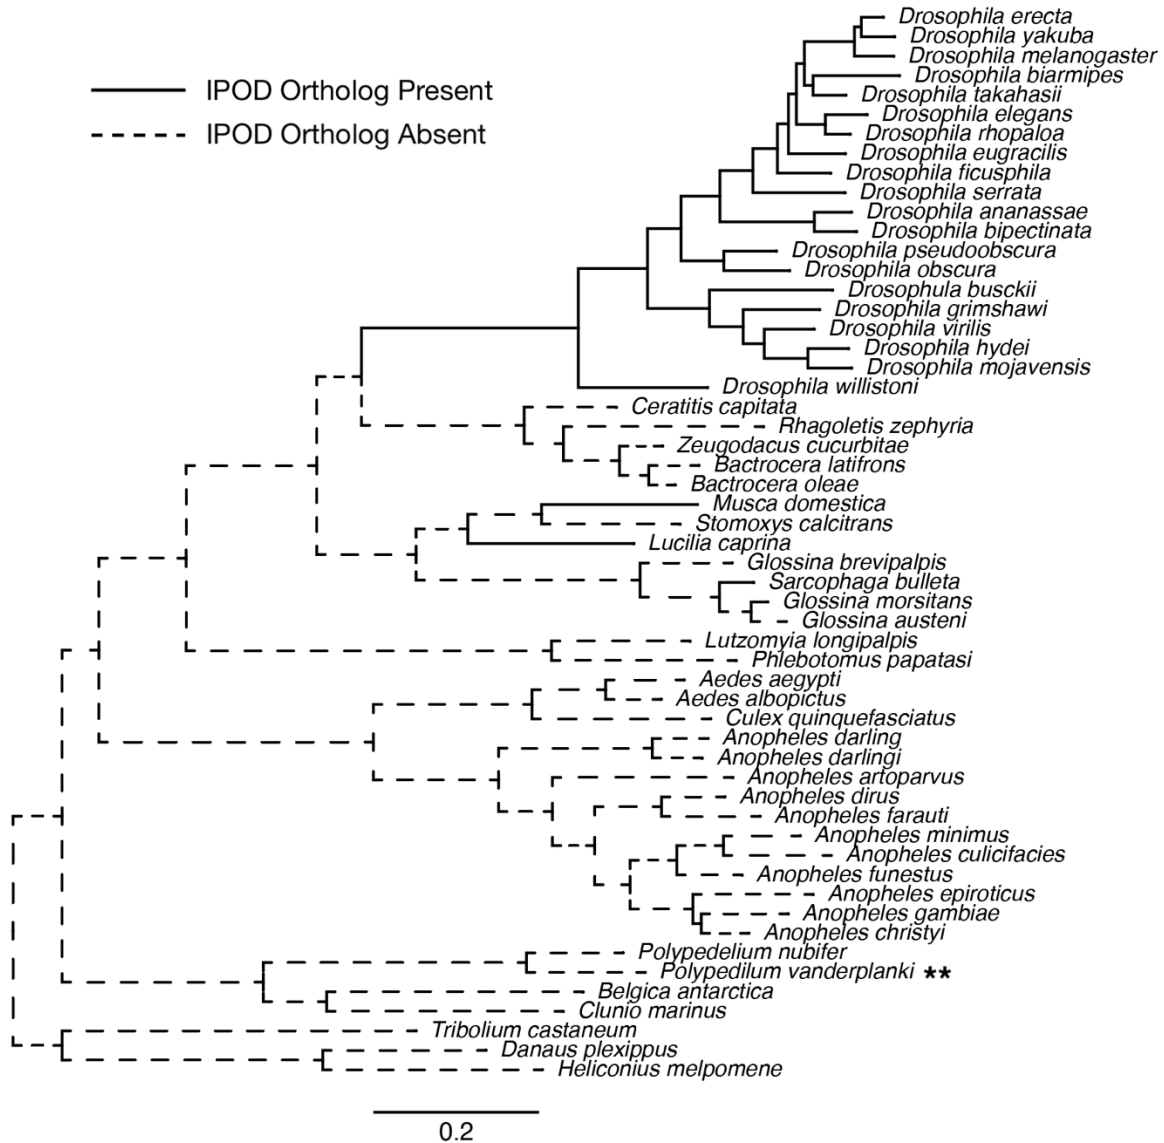

975

976 **Supplementary Figure 4: Presence of IPOD orthologs across *Dipterans*.** *Dipteran*

977 species with known IPOD orthologs (Protein-BLAST) represented on Maximum-

978 likelihood (Deddouche, et al.) tree constructed using DNMT2 sequences in RAxML. As

979 presented in Figure 4B, IPOD orthologs are present within *Drosophilidae* and only three

980 other *Dipteran* species (represented in this tree in solid branches). Protein-BLAST failed

981 to identify any potential IPOD orthologs in other *Dipteran* species (represented with

982 dashed branches). Taxa label with accompanying asterisks (\*\*) represent the lack of a

983 full genome assembly and therefore should not be considered while interpreting the  
984 results. Scale bar represent branch lengths.  
985

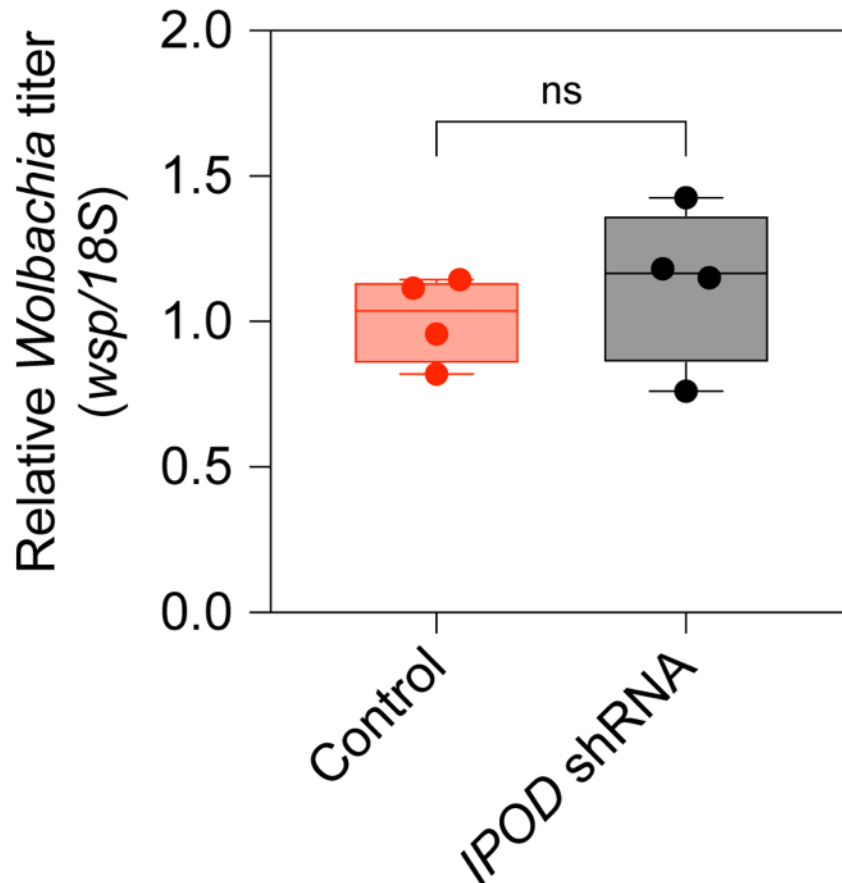

986

987

988 **Supplementary Figure 5: Relative *Wolbachia* titer in *IPOD* knockdown flies.**

989 Quantitative RT-PCR was used to measure expression of the *Wolbachia wsp* gene

990 relative to the endogenous ribosomal 18S RNA in age-matched 2-4 days old adult female

991 flies following RNAi-mediated knockdown of *IPOD*. *IPOD* expression was knocked down

992 in *Wolbachia wMel*-colonized *Drosophila melanogaster* (TRiP line# 60092) by driving

993 expression of a targeting short-hairpin RNA (shRNA) against the target *IPOD* mRNA.

994 Controls represent isogenic sibling flies not expressing the targeting shRNA. Unpaired

995 Welch's t-test:  $p = 0.4788$ ,  $t = 0.7695$ ,  $df = 4$ . Error bars represent standard error of mean

996 of 4 independent experimental replicates. ns = not-significant.

997

998

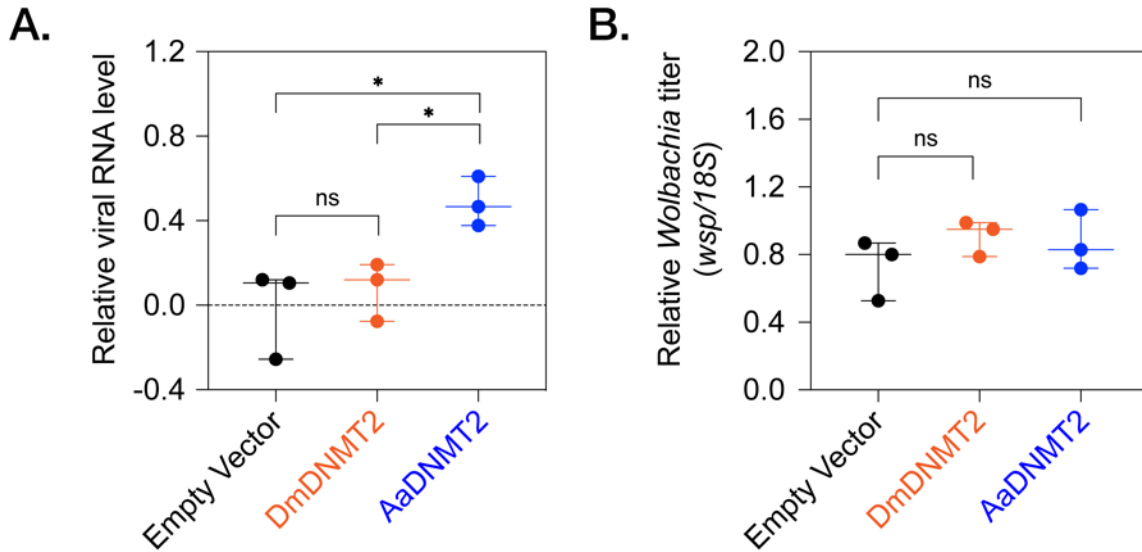

999

1000 **Supplementary Figure 6: Effect of heterologous DNMT2 expression on *Wolbachia***  
1001 **in mosquito cells.** 72 hours post transfection, *Aedes albopictus* derived C710 cells  
1002 (colonized with *wStri* *Wolbachia* strain) expressing either the empty vector, the native  
1003 DNMT2 (*DmDNMT2*) or the non-native DNMT2 (*AaDNMT2*) were challenged with SINV  
1004 at MOI of 10 particles/cell. Cell lysates were collected 48 hours post infection and levels  
1005 of (A) virus and (B) *Wolbachia* RNA levels were assessed using qRT-PCR on total  
1006 extracted RNA. One-way ANOVA with Tukey's post hoc test for multiple comparisons:  
1007 SINV RNA, Empty Vector vs *DmDNMT2*:  $p = 0.7875$ , Empty Vector vs *AaDNMT2*:  $p <$   
1008  $0.05$ , *DmDNMT2* vs *AaDNMT2*:  $p < 0.05$ , *Wolbachia*, Empty Vector vs *DmDNMT2*:  $p =$   
1009  $0.4121$ , Empty Vector vs *AaDNMT2*:  $p = 0.5639$ , *DmDNMT2* vs *AaDNMT2*:  $p = 0.9523$ .  
1010 Error bars represent standard error of mean of 3 independent experiments. \* $p < 0.05$ , ns  
1011 = not-significant.

1012

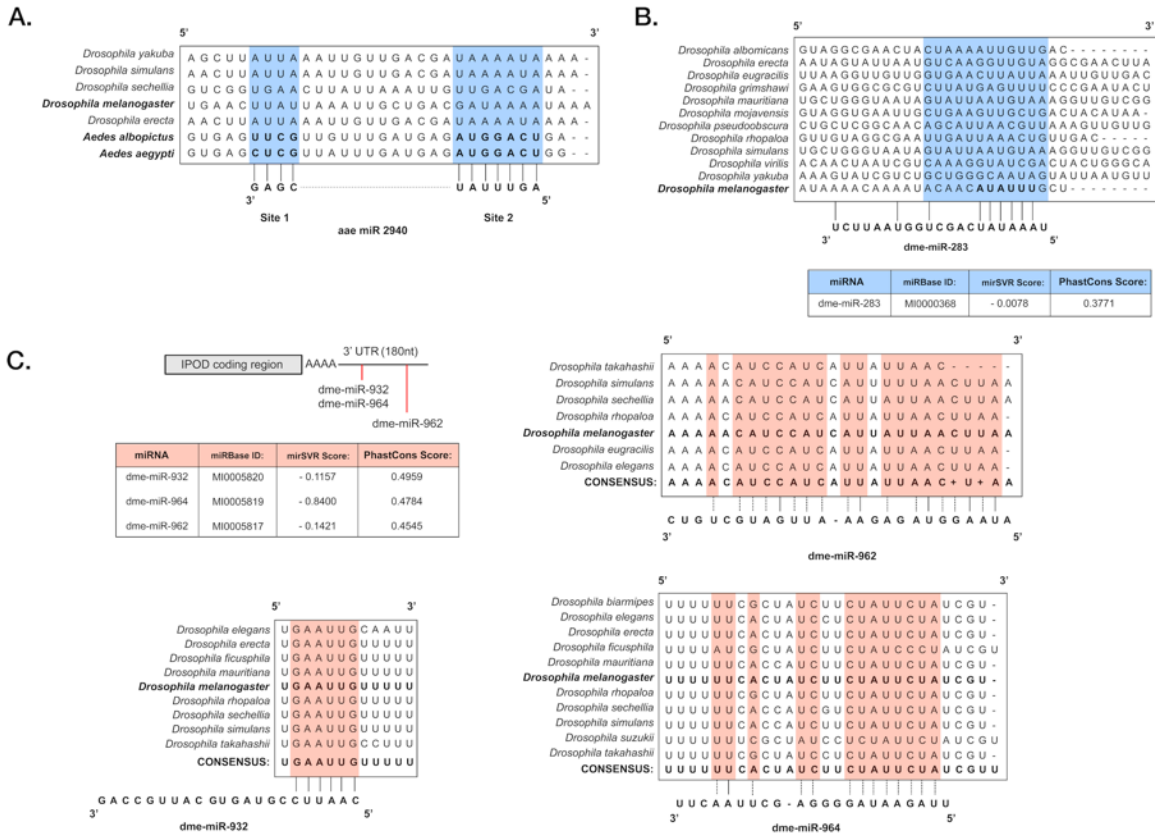

1013

1014 **Supplementary Figure 7: Predicted role of miRNAs in regulation of *Drosophila***

1015 **DNMT2 and IPOD.** (A) Prior studies demonstrate the role of the *Aedes* miRNA *ae-miR-*

1016 *2940-5p* in regulating the expression of *Aedes* DNMT2 orthologs (Zhang et.al. 2013).

1017 Target sequence for this miRNA is conserved at the primary nucleotide sequence level

1018 in *Aedes albopictus* and *Aedes aegypti* DNMT2 (*Mt2*) mRNAs (indicated in the multiple

1019 sequence alignment), but absent in *Mt2* mRNAs of orthologs present in all *Drosophila*

1020 species, including *Drosophila melanogaster* (taxa depicted in bold letters). (B) Location

1021 of conserved miRNA dme-miR-283 predicted to target the 3' untranslated region (3'UTR)

1022 of *Drosophila melanogaster* DNMT2 (taxon depicted in bold letters). (C) Location of

1023 conserved miRNAs predicted using mirSVR (microna.org) to target the 3' untranslated

1024 region (3'UTR) of IPOD. Empirical probability of target downregulation for each miRNA,

1025 considering the conservation of the target site, is indicated by the mirSVR

1026 downregulation scores. Evolutionary conservation of each of the miRNA target

1027 sequences is indicated by the PhastCons scores (PHYlogenetic Analysis with  
1028 Space/Time models CONSevation). (C) Sequence conservation of miRNA target  
1029 region(s) are depicted in light red within aligned nucleotide sequences of 3'UTR regions  
1030 belonging to IPOD orthologs of different *Drosophila* species. Nucleotide sequence(s) of  
1031 *Drosophila melanogaster* IPOD is depicted in bold letters.

1032  
1033

| Primer Name        | Forward Primer Sequence (5'-3')          | Reverse Primer Sequence (5'-3')          |
|--------------------|------------------------------------------|------------------------------------------|
| SINV E1            | TCAGATGCACCACTGGTCTCAACA                 | ATTGACCTTCGCGGTCGGATACAT                 |
| 18S                | CGAAAGTTAGAGGTTCTGAAGGCGA                | CCGTGTTGAGTCAAATTAAGCCGC                 |
| WSP                | CATTGGTGTTGGTGTGGTG                      | ACCGAAATAACGAGCTCCAG                     |
| IPOD               | CTGCTCCCATTGCCTATCAT                     | TAACCATGTCCCGAAGCATAC                    |
| Dnmt2              | CCGTGGCGTGAAATAGCG                       | ACACCGCTTTCGGAGGACG                      |
| pAFW-Mi2_QC_Sall   | ACAAGGATGACGATGACAAGGTCCGAC              | GGGTGGCGCGCCACCCCTTGTGCGAC               |
| pAFW-Mi2_GA_Insert | AGGATGACGATGACAAGGTCATGGTATTTCCGGTCTTAGA | TCGGCGCGCCACCCCTTGTCTCATTTTATCGTCAGCAATT |
| pAFW-AMi2          | GCAACCGGTTTATGAGTGTTACCGACGGA            | GCAGCTAGCTCAGTCCATCTCATCAAACAACGAACTC    |

1034  
1035

1036 **Supplementary Table 1. Primers used in this study.** Primers were purchased from  
1037 Integrated DNA Technologies (IDT). All primers were used at a final concentration of  
1038 10µM for PCR and quantitative RT-PCR reactions.

1039  
1040  
1041  
1042

## 1043 References

1044 Agarwal V, Subtelny AO, Thiru P, Ulitsky I, Bartel DP. 2018. Predicting microRNA targeting efficacy  
1045 in *Drosophila*. *Genome Biol* 19:152.

1046 Baradaran E, Moharramipour S, Asgari S, Mehrabadi M. 2019. Induction of DNA  
1047 methyltransferase genes in *Helicoverpa armigera* following injection of pathogenic bacteria  
1048 modulates expression of antimicrobial peptides and affects bacterial proliferation. *J Insect*  
1049 *Physiol* 118:103939.

1050 Betel D, Koppal A, Agius P, Sander C, Leslie C. 2010. Comprehensive modeling of microRNA targets  
1051 predicts functional non-conserved and non-canonical sites. *Genome Biol* 11:R90.

1052 Bhattacharya T, Newton IL, Hardy RW. 2017. *Wolbachia* elevates host methyltransferase  
1053 expression to block an RNA virus early during infection. *PLoS pathogens* 13:e1006427.



- 1054    Bhattacharya T, Newton ILG, Hardy RW. 2020. Viral RNA is a target for Wolbachia-mediated  
1055    pathogen blocking. *PLoS Pathog* 16:e1008513.
- 1056    Bogdanowicz D, Giaro K. 2017. Comparing Phylogenetic Trees by Matching Nodes Using the  
1057    Transfer Distance Between Partitions. *J Comput Biol* 24:422-435.
- 1058    Bogdanowicz D, Giaro K, Wróbel B. 2012. TreeCmp: Comparison of Trees in Polynomial Time. *Evol*  
1059    *Bioinform Online* 8:475-487.
- 1060    Capra JA, Singh M. 2007. Predicting functionally important residues from sequence conservation.  
1061    *Bioinformatics* 23:1875-1882.
- 1062    Claudio-Piedras F, Recio-Tótoro B, Condé R, Hernández-Tablas JM, Hurtado-Sil G, Lanz-Mendoza  
1063    H. 2019. DNA Methylation in *Anopheles albimanus* Modulates the Midgut Immune Response  
1064    Against *Plasmodium berghei*. *Front Immunol* 10:3025.
- 1065    Deddouche S, Matt N, Budd A, Mueller S, Kemp C, Galiana-Arnoux D, Dostert C, Antoniewski C,  
1066    Hoffmann JA, Imler J-L. 2008. The DExD/H-box helicase Dicer-2 mediates the induction of antiviral  
1067    activity in *Drosophila*. *Nature immunology* 9:1425.
- 1068    Denis H, Ndlovu MN, Fuks F. 2011. Regulation of mammalian DNA methyltransferases: a route to  
1069    new mechanisms. *EMBO reports* 12:647-656.
- 1070    Dosztányi Z. 2018. Prediction of protein disorder based on IUPred. *Protein Sci* 27:331-340.
- 1071    Dosztányi Z, Csizmok V, Tompa P, Simon I. 2005. IUPred: web server for the prediction of  
1072    intrinsically unstructured regions of proteins based on estimated energy content. *Bioinformatics*  
1073    21:3433-3434.
- 1074    Durdevic Z, Hanna K, Gold B, Pollex T, Cherry S, Lyko F, Schaefer M. 2013. Efficient RNA virus  
1075    control in *Drosophila* requires the RNA methyltransferase Dnmt2. *EMBO reports* 14:269-275.
- 1076    Durdevic Z, Mobin MB, Hanna K, Lyko F, Schaefer M. 2013. The RNA methyltransferase Dnmt2 is  
1077    required for efficient Dicer-2-dependent siRNA pathway activity in *Drosophila*. *Cell reports* 4:931-  
1078    937.
- 1079    Durdevic Z, Schaefer M. 2013. Dnmt2 methyltransferases and immunity: an ancient overlooked  
1080    connection between nucleotide modification and host defense? *Bioessays* 35:1044-1049.

- 1081 Falckenhayn C, Carneiro VC, de Mendonça Amarante A, Schmid K, Hanna K, Kang S, Helm M,  
1082 Dimopoulos G, Fantappiè MR, Lyko F. 2016. Comprehensive DNA methylation analysis of the  
1083 *Aedes aegypti* genome. *Sci Rep* 6:36444.
- 1084 Goll MG, Bestor TH. 2005. Eukaryotic cytosine methyltransferases. *Annu. Rev. Biochem.* 74:481-  
1085 514.
- 1086 Goll MG, Kirpekar F, Maggert KA, Yoder JA, Hsieh CL, Zhang X, Golic KG, Jacobsen SE, Bestor TH.  
1087 2006. Methylation of tRNA<sup>Asp</sup> by the DNA methyltransferase homolog Dnmt2. *Science* 311:395-  
1088 398.
- 1089 Grosdidier A, Zoete V, Michielin O. 2011. SwissDock, a protein-small molecule docking web  
1090 service based on EADock DSS. *Nucleic Acids Res* 39:W270-277.
- 1091 Jeltsch A, Ehrenhofer-Murray A, Jurkowski TP, Lyko F, Reuter G, Ankri S, Nellen W, Schaefer M,  
1092 Helm M. 2017. Mechanism and biological role of Dnmt2 in nucleic acid methylation. *RNA biology*  
1093 14:1108-1123.
- 1094 Jiang X, Assis R. 2017. Natural Selection Drives Rapid Functional Evolution of Young *Drosophila*  
1095 Duplicate Genes. *Mol Biol Evol* 34:3089-3098.
- 1096 Jurkowski TP, Meusburger M, Phalke S, Helm M, Nellen W, Reuter G, Jeltsch A. 2008. Human  
1097 DNMT2 methylates tRNA<sup>Asp</sup> molecules using a DNA methyltransferase-like catalytic mechanism.  
1098 *Rna* 14:1663-1670.
- 1099 Kelley LA, Mezulis S, Yates CM, Wass MN, Sternberg MJ. 2015. The Phyre2 web portal for protein  
1100 modeling, prediction and analysis. *Nat Protoc* 10:845-858.
- 1101 Kern AD, Hahn MW. 2018. The Neutral Theory in Light of Natural Selection. *Mol Biol Evol* 35:1366-  
1102 1371.
- 1103 Kozomara A, Birgaoanu M, Griffiths-Jones S. 2019. miRBase: from microRNA sequences to  
1104 function. *Nucleic Acids Res* 47:D155-d162.
- 1105 Kunert N. 2005. Identifizierung und Charakterisierung von IPOD, einem neuen  
1106 Interaktionspartner der DNA-Methyltransferase Dnmt2 aus *Drosophila melanogaster*. [Doctoral].  
1107 [Heidelberg, Germany]: Heidelberg University.

- 1108 Lewis S, Ross L, Bain S, Pahita E, Smith S, Cordaux R, Miska E, Lenhard B, Jiggins F, Sarkies P. 2020.  
1109 Widespread conservation and lineage-specific diversification of genome-wide DNA methylation  
1110 patterns across arthropods. bioRxiv.
- 1111 Li S, Xu J, Sun L, Li R, Jin P, Ma F. 2017. *Drosophila* miR-964 modulates Toll signaling pathway in  
1112 response to bacterial infection. *Dev Comp Immunol* 77:252-258.
- 1113 Lin MJ, Tang LY, Reddy MN, Shen CK. 2005. DNA methyltransferase gene *dDnmt2* and longevity  
1114 of *Drosophila*. *J Biol Chem* 280:861-864.
- 1115 Moutinho AF, Trancoso FF, Dutheil JY. 2019. The Impact of Protein Architecture on Adaptive  
1116 Evolution. *Mol Biol Evol* 36:2013-2028.
- 1117 Ochoa D, Pazos F. 2010. Studying the co-evolution of protein families with the Mirrortree web  
1118 server. *Bioinformatics* 26:1370-1371.
- 1119 Phalke S, Nickel O, Walluscheck D, Hortig F, Onorati MC, Reuter G. 2009. Retrotransposon  
1120 silencing and telomere integrity in somatic cells of *Drosophila* depends on the cytosine-5  
1121 methyltransferase DNMT2. *Nat Genet* 41:696-702.
- 1122 Rainey SM, Martinez J, McFarlane M, Juneja P, Sarkies P, Lulla A, Schnettler E, Varjak M, Merits  
1123 A, Miska EA, et al. 2016. *Wolbachia* Blocks Viral Genome Replication Early in Infection without a  
1124 Transcriptional Response by the Endosymbiont or Host Small RNA Pathways. *PLoS Pathog*  
1125 12:e1005536.
- 1126 Russo CA, Takezaki N, Nei M. 1995. Molecular phylogeny and divergence times of drosophilid  
1127 species. *Mol Biol Evol* 12:391-404.
- 1128 Sawyer SA, Kulathinal RJ, Bustamante CD, Hartl DL. 2003. Bayesian analysis suggests that most  
1129 amino acid replacements in *Drosophila* are driven by positive selection. *J Mol Evol* 57 Suppl  
1130 1:S154-164.
- 1131 Schaefer M, Lyko F. 2010. Lack of evidence for DNA methylation of *Invader4* retroelements in  
1132 *Drosophila* and implications for *Dnmt2*-mediated epigenetic regulation. *Nat Genet* 42:920-921;  
1133 author reply 921.
- 1134 Schaefer M, Pollex T, Hanna K, Tuorto F, Meusburger M, Helm M, Lyko F. 2010. RNA methylation  
1135 by *Dnmt2* protects transfer RNAs against stress-induced cleavage. *Genes & development*  
1136 24:1590-1595.

1137 Sella G, Petrov DA, Przeworski M, Andolfatto P. 2009. Pervasive natural selection in the  
1138 *Drosophila* genome? PLoS Genet 5:e1000495.

1139 Stamatakis A. 2014. RAxML version 8: a tool for phylogenetic analysis and post-analysis of large  
1140 phylogenies. Bioinformatics 30:1312-1313.

1141 Takayama S, Dhahbi J, Roberts A, Mao G, Heo SJ, Pachter L, Martin DI, Boffelli D. 2014. Genome  
1142 methylation in *D. melanogaster* is found at specific short motifs and is independent of DNMT2  
1143 activity. Genome Res 24:821-830.

1144 Tuorto F, Liebers R, Musch T, Schaefer M, Hofmann S, Kellner S, Frye M, Helm M, Stoecklin G,  
1145 Lyko F. 2012. RNA cytosine methylation by Dnmt2 and NSun2 promotes tRNA stability and  
1146 protein synthesis. Nature structural & molecular biology 19:900.

1147 Vieira GC, D'Ávila M F, Zanini R, Deprá M, da Silva Valente VL. 2018. Evolution of DNMT2 in  
1148 drosophilids: Evidence for positive and purifying selection and insights into new protein  
1149 (pathways) interactions. Genet Mol Biol 41:215-234.

1150 Williams GD, Gokhale NS, Horner SM. 2019. Regulation of Viral Infection by the RNA Modification  
1151 N6-Methyladenosine. Annu Rev Virol 6:235-253.

1152 Yang Z. 2007. PAML 4: phylogenetic analysis by maximum likelihood. Mol Biol Evol 24:1586-1591.

1153 Ye F, Kong X, Zhang H, Liu Y, Shao Z, Jin J, Cai Y, Zhang R, Li L, Zhang YW, et al. 2018. Biochemical  
1154 Studies and Molecular Dynamic Simulations Reveal the Molecular Basis of Conformational  
1155 Changes in DNA Methyltransferase-1. ACS Chem Biol 13:772-781.

1156 Zhang G, Hussain M, O'Neill SL, Asgari S. 2013. Wolbachia uses a host microRNA to regulate  
1157 transcripts of a methyltransferase, contributing to dengue virus inhibition in *Aedes aegypti*. Proc  
1158 Natl Acad Sci U S A 110:10276-10281.

1159
